# Supplementary material
Source: publisher figshare collection journal article supplement (https://acs.figshare.com/ndownloader/files/17418818)
Supplement: Supplementary file 1 [file 17418818]

## Sheet: Sheet1
Table S3. WGCNA results of transcriptome dataset.
Module	Gene_id	Sprot_GN	Ara_GN
GM1	TEA021134.1	--	AT2G06025
GM1	TEA018465.1	Os04g0386900	--
GM1	TEA024017.1	BHLH80	FBH1
GM1	TEA002862.1	PBL21	ASG5
GM1	TEA029077.1	SD17	CRK20
GM1	TEA031705.1	PBL3	APK2B
GM1	TEA011750.1	RCH2	AT3G24240
GM1	TEA021137.1	At5g49770	AT5G49760
GM1	TEA009516.1	SAP4	AT1G51200
GM1	TEA014214.1	EML3	EML3
GM1	TEA025390.1	MCCA	MCCA
GM1	TEA030843.1	DUF3	AT5G55600
GM1	TEA020806.1	PUX1	PUX1
GM1	TEA020119.1	--	AT1G50570
GM1	TEA029955.1	SPAC16E8.02	AT1G18720
GM1	TEA000339.1	--	AT1G55340
GM1	TEA010231.1	zcchc8	AT5G38600
GM1	TEA024649.1	At1g23390	AT1G23390
GM1	TEA014376.1	SEC10b	SEC10
GM1	TEA001416.1	BCA5	BCA5
GM1	TEA022075.1	MICU	AT4G32060
GM1	TEA018710.1	ULP1D	ULP1D
GM1	TEA028966.1	HSP21	HSP21
GM1	TEA022880.1	TUFA	SGF29a
GM1	TEA003561.1	WDTC1	ASG2
GM1	TEA018388.1	--	--
GM1	TEA026410.1	pckA	--
GM1	TEA004215.1	LNG1	TRM4
GM1	TEA032335.1	TOM9-2	AT3G19340
GM1	TEA021138.1	CCX4	CCX4
GM1	TEA022522.1	PCMP-H8	AT1G18485
GM1	TEA015815.1	CMTA3	SR1
GM1	TEA030625.1	--	AT4G14390
GM1	TEA024019.1	NPF5.10	AT1G22540
GM1	TEA018808.1	MED4	AT5G02850
GM1	TEA020303.1	CUL4	CUL4
GM1	TEA000889.1	IAR1	IAR1
GM1	TEA032921.1	--	AT1G23180
GM1	TEA006941.1	SRFR1	SRFR1
GM1	TEA020934.1	LHT1	AT1G11020
GM1	TEA000732.1	MTM1	MTM1
GM1	TEA022969.1	ATG8C	APG8A
GM1	TEA017041.1	At3g54510	AT3G54510
GM1	TEA005329.1	N	AT5G36930
GM1	TEA020850.1	--	--
GM1	TEA026955.1	--	AT5G59140
GM1	TEA025202.1	E134_MAIZE Endo-1,3;1,4-beta-D-glucanase OS=Zea mays PE=1 SV=1	AT3G23600
GM1	TEA000262.1	xpnpep1	APP1
GM1	TEA006008.1	XRN3	SAG18
GM1	TEA020143.1	PEX13	PEX13
GM1	TEA023027.1	FLACCA	ABA3
GM1	TEA004321.1	PCMP-H65	AT4G01030
GM1	TEA033536.1	HIPP28	AT4G27590
GM1	TEA008415.1	--	AT3G50430
GM1	TEA012955.1	--	AT4G12830
GM1	TEA019676.1	creC	AT3G53390
GM1	TEA021722.1	At2g27800	AT2G27800
GM1	TEA013419.1	--	AT4G25670
GM1	TEA029426.1	ATL1	AT1G04360
GM1	TEA017079.1	SDN5	AT5G25800
GM1	TEA032085.1	STY46	STY46
GM1	TEA032082.1	At1g76070	AT1G76070
GM10	TEA014500.1	ASIL2	AT3G54390
GM10	TEA016692.1	CIPK18	CIPK20
GM10	TEA005147.1	LECRK92	AT5G65600
GM10	TEA000099.1	At3g07620	AT3G07620
GM10	TEA028744.1	CDC6B	AT1G07270
GM10	TEA007468.1	PGMP	PGM
GM10	TEA017508.1	At4g18975	AT4G18975
GM10	TEA018790.1	--	AT2G19880
GM10	TEA012140.1	COP10	FUS9
GM10	TEA009682.1	FG3	UF3GT
GM10	TEA017135.1	At1g50180	AT1G50180
GM10	TEA015526.1	WSD1	AT3G49210
GM10	TEA032891.1	SH3P2	AT4G34660
GM10	TEA026324.1	CYP76C2	CYP76C2
GM10	TEA022523.1	OBAP2B	AT1G29680
GM10	TEA007837.1	--	--
GM10	TEA009929.1	OMA1	AT5G51740
GM10	TEA018802.1	SFT2	AT4G26550
GM10	TEA005427.1	notch1a	AT4G03500
GM10	TEA032506.1	XI-K	XIK
GM10	TEA020859.1	PGR3	PGR3
GM10	TEA021969.1	GAUT10	GAUT10
GM10	TEA015719.1	At5g60050	AT5G60050
GM10	TEA012926.1	GLCAT14B	AT3G15350
GM10	TEA020154.1	HMGCL	AT2G26800
GM10	TEA012888.1	YIPL_SOLTU Protein yippee-like OS=Solanum tuberosum PE=2 SV=1	AT2G40110
GM10	TEA023290.1	--	AT5G14910
GM10	TEA021712.1	ALDH2B4	ALDH2B4
GM10	TEA005228.1	--	AT3G60310
GM10	TEA029824.1	--	AT1G45688
GM10	TEA000223.1	SCPL6	scpl16
GM10	TEA017646.1	--	AT5G51160
GM10	TEA013360.1	CAD	ELI3-2
GM10	TEA010589.1	Os02g0491600	AT5G38940
GM10	TEA003123.1	--	AT5G45410
GM10	TEA023314.1	C7A52_PANGI Beta-amyrin 28-oxidase OS=Panax ginseng PE=2 SV=1	CYP716A1
GM10	TEA007049.1	CHI3	AT4G17250
GM10	TEA007764.1	PAP22	PAP22
GM10	TEA009825.1	E2FA	E2F3
GM10	TEA007838.1	--	AT2G21830
GM10	TEA014184.1	VIT_19s0014g04930	TPS21
GM10	TEA016673.1	UGT85A24	UGT85A1
GM10	TEA007304.1	--	AT3G49800
GM10	TEA025720.1	CCT5	AT1G24510
GM10	TEA010583.1	Os02g0491600	AT3G05950
GM100	TEA005438.1	DOF3.5	AT3G52440
GM100	TEA020430.1	At3g19360	AT3G19360
GM100	TEA030312.1	Os02g0201900	AT3G02065
GM100	TEA012310.1	SCL14	SCL14
GM100	TEA000861.1	DREB2A	DREB2A
GM100	TEA025043.1	At1g61550	AT1G61550
GM100	TEA032279.1	IPP	PPa4
GM100	TEA010241.1	WAK2	WAK2
GM100	TEA025197.1	rex4	AT3G27970
GM100	TEA013695.1	--	--
GM100	TEA005314.1	NRPE5A	NRPE5
GM100	TEA000972.1	GIP1	GIP1
GM100	TEA030036.1	HCT1	AT1G78990
GM100	TEA011751.1	CRK	CRK
GM100	TEA010908.1	EHD1	EHD1
GM100	TEA022783.1	CYCB2-4	CYCB2%3B4
GM100	TEA004268.1	--	AT1G20070
GM100	TEA029210.1	BRL2	AT5G56040
GM100	TEA018599.1	--	--
GM100	TEA005595.1	--	AT5G57770
GM100	TEA001009.1	usp13	AT1G04850
GM100	TEA017989.1	--	EMB2762
GM100	TEA029061.1	At2g32000	AT2G32000
GM100	TEA021472.1	--	--
GM100	TEA005728.1	ALF4	ALF4
GM100	TEA006341.1	At5g07610	AT5G07610
GM100	TEA021324.1	At3g28050	UMAMIT41
GM100	TEA011030.1	At5g07610	AT5G07610
GM100	TEA000483.1	ABHD17B	AT1G32190
GM100	TEA000492.1	At3g06240	AT3G06240
GM100	TEA002791.1	RG	BGLU17
GM100	TEA013644.1	FPA	FPA
GM100	TEA010651.1	SPAC869.01	AT4G34880
GM100	TEA018609.1	--	--
GM100	TEA004347.1	HMT1	HMT-1
GM100	TEA021303.1	PHL5	AT1G63855
GM100	TEA029769.1	CYP82A3	CYP82C4
GM100	TEA023785.1	sf3b1	AT5G64270
GM100	TEA004006.1	--	--
GM100	TEA002426.1	exgA	CPSF160
GM100	TEA017753.1	GSTU24	GSTU24
GM100	TEA032286.1	--	AT1G28760
GM100	TEA026221.1	TDL1	AT1G32583
GM100	TEA031809.1	--	--
GM100	TEA010539.1	PRT6	AT5G04480
GM100	TEA022667.1	OPR11	OPR2
GM100	TEA006197.1	At1g32220	AT5G10730
GM100	TEA020868.1	ycf20	NPQ6
GM100	TEA002440.1	At1g77405	AT1G77405
GM100	TEA014359.1	BON3	BON3
GM100	TEA032856.1	app	AT5G05070
GM100	TEA006493.1	At3g50520	AT3G50520
GM100	TEA026056.1	PRXIIE-1	AT3G52960
GM100	TEA030452.1	ANN5	ANN5
GM100	TEA020298.1	THRRS	AT5G26830
GM100	TEA000842.1	PAHX	PAHX
GM100	TEA014277.1	EDM2	EDM2
GM100	TEA007454.1	OEP37	OEP37
GM100	TEA002244.1	--	AT3G23370
GM101	TEA013996.1	At1g16060	ADAP
GM101	TEA013444.1	--	AT1G75710
GM101	TEA004324.1	WIN1	SHN1
GM101	TEA018915.1	TULP5	TLP2
GM101	TEA012207.1	RSH1	RSH1
GM101	TEA024408.1	ILK1	AT2G43850
GM101	TEA004044.1	HERK1	HERK1
GM101	TEA005553.1	At4g27290	AT4G27290
GM101	TEA017441.1	PRP4	PRP4
GM101	TEA027647.1	CSLC4	CSLC04
GM101	TEA009326.1	PNSB3	AT4G32590
GM101	TEA006871.1	SBT3.5	SBT3.5
GM101	TEA030508.1	ABCG32	ABCG32
GM101	TEA008782.1	At1g64390	GH9C2
GM101	TEA030603.1	ARC5	ARC5
GM101	TEA009187.1	RBCX1	RbcX1
GM101	TEA007124.1	At1g16860	AT4G22290
GM101	TEA006458.1	--	AT2G39690
GM101	TEA004097.1	--	AT5G15780
GM101	TEA013326.1	PPR4	AT5G04810
GM101	TEA030217.1	GSTU10	GSTU10
GM101	TEA013677.1	--	AT2G41830
GM101	TEA000095.1	HIPP41	AT1G55790
GM101	TEA007526.1	TRM32	DAU1
GM101	TEA024775.1	ZMAT2	AT3G05760
GM101	TEA031782.1	CUT1	KCS6
GM101	TEA006418.1	NFD4	AT2G28120
GM101	TEA027577.1	At5g67385	AT5G67385
GM101	TEA021003.1	NUDT8	NUDT8
GM101	TEA017694.1	At1g54790	AT1G54790
GM101	TEA002128.1	otud5a	AT5G04250
GM101	TEA002157.1	BDG3	AT4G24140
GM101	TEA020529.1	CAC3	CAC3
GM101	TEA008353.1	CNGC4	CNGC4
GM101	TEA012895.1	--	--
GM101	TEA017870.1	LTPG2	LTPG2
GM101	TEA001815.1	At4g06744	AT3G19320
GM101	TEA004229.1	--	AT3G15115
GM101	TEA017719.1	EPHX4	AT2G18360
GM101	TEA017118.1	CTPA2	AT4G17740
GM101	TEA004926.1	MDH1	AT5G58330
GM101	TEA020515.1	CAC3	CAC3
GM101	TEA006790.1	PPA4	PPa4
GM101	TEA030679.1	At5g67130	AT1G49740
GM101	TEA015524.1	WSD1	AT3G49190
GM101	TEA026304.1	CYP76AH1	CYP76C3
GM101	TEA002133.1	TOM2AH3	AT2G20740
GM101	TEA002846.1	rsgI6	AT4G33840
GM101	TEA003753.1	MUR4	MUR4
GM101	TEA003465.1	SPCC4G3.17	AT1G26160
GM101	TEA018874.1	CNGC4	CNGC4
GM101	TEA016502.1	GPDHC1	GPDHC1
GM101	TEA013063.1	ACLA-3	ACLA-3
GM101	TEA028623.1	--	AT5G42690
GM101	TEA018200.1	RHN1	ARA7
GM101	TEA016574.1	ALDH3F1	ALDH3F1
GM101	TEA027541.1	TBL19	TBL19
GM101	TEA016395.1	SBT2.6	AT4G30020
GM101	TEA025919.1	MIB	AT5G53310
GM101	TEA023992.1	--	--
GM101	TEA025508.1	AKR1	AT1G60690
GM101	TEA000224.1	AGO16	AGO6
GM101	TEA025254.1	--	--
GM101	TEA002464.1	FBL3	AT5G01720
GM101	TEA017285.1	ACOC_CUCMA Aconitate hydratase, cytoplasmic OS=Cucurbita maxima PE=2 SV=1	ACO3
GM101	TEA027853.1	GAUT4	GAUT4
GM102	TEA014689.1	BHLH66	LRL1
GM102	TEA000045.1	DOF1.2	AT1G21340
GM102	TEA014060.1	NAC073	NAC075
GM102	TEA028649.1	ERF034	AT2G44940
GM102	TEA004715.1	PXC1	AT2G36570
GM102	TEA006075.1	At3g28040	AT3G28040
GM102	TEA007731.1	At5g49770	AT1G79620
GM102	TEA001045.1	KUA1	AT1G70000
GM102	TEA017447.1	VTE4	G-TMT
GM102	TEA015964.1	At4g28440	AT2G33845
GM102	TEA029704.1	ACA10	ACA10
GM102	TEA012315.1	At5g10770	AT5G10770
GM102	TEA007514.1	NEK1	NEK1
GM102	TEA018433.1	Dcun1d4	AT1G15860
GM102	TEA018382.1	FBP	HCEF1
GM102	TEA001519.1	URGT6	AT1G34020
GM102	TEA000712.1	--	AT1G78915
GM102	TEA026009.1	CESA7	IRX3
GM102	TEA022180.1	At5g43190	AT5G43190
GM102	TEA017493.1	GSVIVT00026920001	AT3G16850
GM102	TEA026543.1	OVA2	OVA2
GM102	TEA026409.1	MFDR	AT4G32360
GM102	TEA032926.1	--	AT2G27660
GM102	TEA032850.1	FLA4	SOS5
GM102	TEA015580.1	GS1-1	GSR 1
GM102	TEA032233.1	ASPG2	AT3G20015
GM102	TEA011321.1	SBT1.7	ARA12
GM102	TEA001095.1	tbc1d2b	AT3G07890
GM102	TEA017754.1	At5g65000	AT5G65000
GM102	TEA017881.1	--	AT5G54530
GM102	TEA015912.1	--	AT2G27950
GM102	TEA017743.1	14KD_DAUCA 14 kDa proline-rich protein DC2.15 OS=Daucus carota PE=2 SV=1	AT1G62510
GM102	TEA022336.1	SWEET2	SWEET2
GM102	TEA014188.1	EMB2758	EMB2758
GM102	TEA013583.1	At5g07610	AT5G07610
GM102	TEA016912.1	GLR1.4	AT5G43400
GM102	TEA009560.1	--	--
GM102	TEA029058.1	--	AT5G07380
GM102	TEA005308.1	FIS1A	BIGYIN
GM102	TEA021734.1	At1g67280	AT1G67280
GM102	TEA030888.1	GLR3.6	GLR3.6
GM102	TEA019397.1	CHIT1B	HCHIB
GM102	TEA021707.1	PGMP	PGM
GM102	TEA012251.1	DIR25	AT1G07730
GM102	TEA033119.1	CPRD49	AT3G11210
GM102	TEA020263.1	SBT1.7	ARA12
GM102	TEA000475.1	--	--
GM102	TEA006015.1	FKBP65	AT5G48570
GM102	TEA018123.1	At1g12500	AT1G12500
GM102	TEA029871.1	AMPD	FAC1
GM102	TEA021910.1	PLT4	AT2G20780
GM102	TEA003616.1	NHL6	NHL25
GM102	TEA011919.1	--	AT4G14746
GM102	TEA020762.1	TPK2	KCO2
GM102	TEA025619.1	ADF_VITVI Actin-depolymerizing factor OS=Vitis vinifera PE=2 SV=1	ADF6
GM102	TEA022117.1	--	AT5G59960
GM102	TEA023500.1	F3H-3	KUOX1
GM102	TEA015597.1	At1g26500	AT1G26500
GM102	TEA017416.1	PAO5	PAO5
GM102	TEA001650.1	AK2	CARAB-AK-LYS
GM102	TEA029800.1	OPR3	OPR3
GM102	TEA009674.1	--	AT3G60380
GM102	TEA021154.1	At5g26960	AT5G26960
GM102	TEA006998.1	--	AT1G47410
GM102	TEA001267.1	--	AT5G61450
GM102	TEA025403.1	SULTR3;1	SULTR3%3B1
GM102	TEA004129.1	--	AT3G53470
GM102	TEA030981.1	RNS1	RNS1
GM103	TEA026944.1	NLP6	AT1G64530
GM103	TEA000303.1	ERF113	Rap2.6L
GM103	TEA014528.1	SPL7	SPL7
GM103	TEA003819.1	Os10g0391300	AT5G66840
GM103	TEA032501.1	NFYB8	NF-YB1
GM103	TEA000643.1	RLK5	AT5G25930
GM103	TEA008235.1	SD113	SD1-13
GM103	TEA024769.1	Os05g0571100	emb1692
GM103	TEA024676.1	At5g41260	BSK7
GM103	TEA032958.1	At3g47570	AT3G47090
GM103	TEA023488.1	CPK5	CPK6
GM103	TEA026078.1	HSL1	HSL1
GM103	TEA030396.1	Trmt61a	AT5G14600
GM103	TEA019192.1	ARR15	ARR15
GM103	TEA022727.1	MRG1	AT4G37280
GM103	TEA004233.1	At1g18980	AT1G18980
GM103	TEA026124.1	BSP_BOSSE Basic secretory protease (Fragments) OS=Boswellia serrata PE=1 SV=1	AT2G15220
GM103	TEA005973.1	MORF7	AT1G72530
GM103	TEA004171.1	ZTP29	AT3G20870
GM103	TEA017024.1	ACBP1	ACBP1
GM103	TEA019388.1	AHL23	AT4G17800
GM103	TEA030721.1	CHX24	CHX24
GM103	TEA004948.1	NIFU4	NFU4
GM103	TEA013308.1	ALMT2	AT1G08440
GM103	TEA027777.1	ACD6	AT4G03460
GM103	TEA016984.1	HOX27	HAT14
GM103	TEA013368.1	C28H8.4	AT4G38790
GM103	TEA003320.1	--	UNE2
GM103	TEA014598.1	EIF(ISO)4G1	eIFiso4G1
GM103	TEA020824.1	RPL21A	AT1G09590
GM103	TEA013507.1	--	AT1G27100
GM103	TEA011989.1	--	AT1G49000
GM103	TEA013413.1	ABCG6	ABCG6
GM103	TEA016482.1	AOP1.2	AT1G52800
GM103	TEA025989.1	PLR_Lu2	PRR1
GM103	TEA016843.1	--	AT1G21830
GM103	TEA013851.1	B2_DAUCA B2 protein OS=Daucus carota PE=2 SV=1	AT5G61910
GM103	TEA019367.1	TPRP-F1	AT3G22142
GM103	TEA027303.1	TFIIB2	AT3G10330
GM103	TEA004380.1	SPS1	SPS2F
GM103	TEA022648.1	MAKR4	MAKR4
GM103	TEA027267.1	LRK10L-1.4	AT1G66880
GM103	TEA000162.1	MED4	AT5G02850
GM103	TEA011026.1	OsI_027940	AT4G02450
GM103	TEA008938.1	DTX48	ZF14
GM103	TEA023553.1	RPS2D	AT3G57490
GM103	TEA005444.1	--	AT5G03460
GM103	TEA014602.1	At2g33490	AT2G33490
GM103	TEA002245.1	RPL14A	AT2G20450
GM103	TEA003269.1	RSL1D1	AT3G58660
GM103	TEA020896.1	MED32	MED32
GM103	TEA020231.1	--	AT3G27230
GM103	TEA021998.1	At2g13100	G3Pp5
GM103	TEA031732.1	--	AT3G03290
GM103	TEA010268.1	IP5P8	AT2G37440
GM103	TEA006012.1	--	--
GM103	TEA032933.1	GFPT2	GFAT
GM103	TEA013356.1	PIP1-2	PIP1%3B4
GM103	TEA001217.1	--	--
GM103	TEA033626.1	PCMP-E5	AT1G77010
GM103	TEA016947.1	EXPA15	EXPA15
GM103	TEA024469.1	VIII-1	ATM1
GM103	TEA020691.1	PCKR1	ROC3
GM103	TEA024540.1	--	RLP14
GM103	TEA015123.1	At5g35200	AT5G35200
GM103	TEA021803.1	ARP1	ARP1
GM103	TEA012962.1	RPL37C	AT3G16080
GM103	TEA006992.1	AMY1.1	AMY1
GM103	TEA002926.1	SCL30	SCL30
GM103	TEA000167.1	RPL4	AT3G09630
GM103	TEA018875.1	FLXL1	AT3G14750
GM103	TEA017086.1	DOGL4	RAS1
GM103	TEA002184.1	CXE1	CXE20
GM103	TEA012778.1	At2g45640	SAP18
GM103	TEA021903.1	RPL21M	NFD1
GM103	TEA000746.1	RPL34	AT1G26880
GM103	TEA029082.1	RTE1	RTE1
GM103	TEA015503.1	PCKA	PCK1
GM103	TEA002703.1	Pdcd2	AT4G02220
GM103	TEA007035.1	--	--
GM103	TEA005955.1	atad-3	AT3G03060
GM103	TEA024566.1	HST	HCT
GM103	TEA031579.1	--	AT3G17780
GM103	TEA020865.1	--	AT1G05020
GM103	TEA001413.1	MDP1	AT2G14110
GM103	TEA013732.1	--	--
GM103	TEA030164.1	RPL13AB	AT3G24830
GM103	TEA026285.1	WEX	AT3G12470
GM103	TEA001020.1	Bp10	sks5
GM104	TEA014036.1	ATRX	ATRX
GM104	TEA033252.1	MTERF18	AT4G19650
GM104	TEA004702.1	DIVARICATA	AT5G05790
GM104	TEA033845.1	NLP6	AT5G16100
GM104	TEA008723.1	MIK2	AT4G08850
GM104	TEA005623.1	PERK1	AT1G77280
GM104	TEA016172.1	PUR2	PUR2
GM104	TEA005183.1	SRK2E	OST1
GM104	TEA007079.1	4MMP	AT2G45040
GM104	TEA008740.1	PKP4	AT3G49160
GM104	TEA007506.1	pgk	AT1G16445
GM104	TEA015828.1	FBL11	AT2G36370
GM104	TEA025733.1	ATL21A	AT2G46495
GM104	TEA000353.1	eif3g-a	EIF3G1
GM104	TEA020274.1	At5g03905	AT5G03905
GM104	TEA026824.1	PIN8	PIN8
GM104	TEA030733.1	--	AT4G03260
GM104	TEA027224.1	At1g31830	PUT2
GM104	TEA003476.1	--	AT3G52520
GM104	TEA018703.1	Wapl	AT1G11060
GM104	TEA029973.1	--	AT1G24440
GM104	TEA024753.1	At1g06990	AT1G06990
GM104	TEA020789.1	--	AT2G15020
GM104	TEA002564.1	SKI2	AT3G46960
GM104	TEA002587.1	CSLG2	CSLG2
GM104	TEA009805.1	--	AT5G56480
GM104	TEA030149.1	--	AT3G18670
GM104	TEA028416.1	ZEU1	ZEU1
GM104	TEA008935.1	PAP15	PAP15
GM104	TEA017300.1	--	AT5G58510
GM104	TEA003506.1	--	--
GM104	TEA010533.1	CYP89A2	CYP89A5
GM104	TEA010127.1	CAD	ELI3-2
GM104	TEA018765.1	--	AT2G31140
GM104	TEA020890.1	SDH	AT5G51970
GM104	TEA029771.1	QPT	QPT
GM104	TEA014738.1	YTHDF2	ECT2
GM104	TEA027181.1	ATL72	AT3G10910
GM104	TEA024278.1	KIN7G	AT3G51150
GM104	TEA002396.1	ALA3	ALA3
GM104	TEA031341.1	MYR2	MYR2
GM104	TEA020946.1	PAE9	AT5G23870
GM104	TEA027505.1	RAD52-1	RAD52-1
GM104	TEA023478.1	MPT1	PHT3%3B3
GM104	TEA030018.1	At3g23880	AT3G23880
GM104	TEA002880.1	PREP	AT1G04200
GM104	TEA026469.1	--	AT2G02410
GM104	TEA004145.1	PCMP-H61	AT5G66520
GM104	TEA032026.1	--	AT1G70160
GM104	TEA017355.1	CYTI_VIGUN Cysteine proteinase inhibitor OS=Vigna unguiculata PE=1 SV=1	CYSB
GM104	TEA019664.1	UBP26	UBP26
GM104	TEA014728.1	GFA2	GFA2
GM104	TEA027435.1	ILL1	IAR3
GM104	TEA027135.1	At5g09450	AT5G09450
GM104	TEA024225.1	At3g18150	AT3G18150
GM104	TEA028763.1	--	AT1G24267
GM104	TEA032475.1	PGR5	PGR5
GM104	TEA015936.1	PLR3	AT4G34540
GM104	TEA017588.1	METTL6	AT1G54650
GM104	TEA007812.1	TLP1	AT1G20030
GM104	TEA026450.1	CCR1	AT2G02400
GM104	TEA029096.1	PCMP-H73	ECB2
GM104	TEA019769.1	FAD4	FADA
GM104	TEA009336.1	LOG8	LOG8
GM104	TEA005143.1	At4g01037	AT5G21970
GM104	TEA010714.1	MBR2	AT2G37150
GM104	TEA018701.1	PRP31	emb1220
GM104	TEA028679.1	SOT12	SOT12
GM104	TEA012205.1	PPAN	PPAN
GM104	TEA029911.1	SC35	SC35
GM104	TEA029376.1	PAT15	AT5G04270
GM104	TEA031309.1	Mettl17	AT1G64600
GM104	TEA008987.1	HD16	AT3G03940
GM104	TEA000006.1	PCMP-H8	AT1G18485
GM104	TEA016840.1	--	AT2G35736
GM104	TEA032940.1	At5g08310	AT5G08310
GM104	TEA000366.1	purH	AT2G35040
GM104	TEA007061.1	APT3	APT3
GM104	TEA005381.1	KEA2	KEA2
GM104	TEA030649.1	PYD2	PYD2
GM104	TEA010331.1	At5g22700	AT5G22700
GM104	TEA013126.1	--	TZP
GM104	TEA011507.1	--	AT1G05730
GM104	TEA005370.1	SPOUT1	AT5G19300
GM104	TEA028492.1	TP53I3	AT4G21580
GM104	TEA005114.1	At1g59780	AT1G59780
GM104	TEA015714.1	HD3A	FT
GM104	TEA023224.1	eif3m	AT5G15610
GM104	TEA016972.1	UGT94E5	AT2G18570
GM104	TEA010862.1	RH31	AT5G63630
GM104	TEA021633.1	CUL1	CUL1
GM104	TEA001929.1	FAB1C	FAB1C
GM104	TEA018146.1	At5g34940	GUS3
GM104	TEA001271.1	At5g58770	cPT4
GM104	TEA019483.1	wdr83	AT5G64730
GM104	TEA032105.1	At1g64890	AT1G64890
GM104	TEA010852.1	--	AT1G71840
GM104	TEA026972.1	--	--
GM104	TEA008370.1	NIN3	INV-E
GM104	TEA008060.1	N	--
GM104	TEA007516.1	PUS7	AT3G04820
GM104	TEA016176.1	apgM	AT3G30841
GM104	TEA016006.1	--	--
GM104	TEA023599.1	STA	STP7
GM104	TEA029732.1	URIC2_CANLI Uricase-2 isozyme 2 OS=Canavalia lineata PE=2 SV=1	AT2G26230
GM104	TEA017861.1	Os10g0113000	AT1G59960
GM104	TEA026901.1	--	AT2G31920
GM104	TEA004762.1	RH20	RH20
GM104	TEA022203.1	Wdr43	AT1G15420
GM104	TEA022313.1	CRR2	CRR2
GM105	TEA012509.1	ERF003	ESE3
GM105	TEA006335.1	E2FF	DEL3
GM105	TEA004707.1	BHLH094	BPEp
GM105	TEA011696.1	TRP4	TRFL6
GM105	TEA003686.1	CPK30	CPK30
GM105	TEA007343.1	SD18	RK3
GM105	TEA011818.1	TDR	PXY
GM105	TEA023372.1	CIPK6	SIP3
GM105	TEA023789.1	RLK902	RLK902
GM105	TEA019518.1	LPXA	LpxA
GM105	TEA019541.1	LPXA	LpxA
GM105	TEA015941.1	VPS41	VPS41
GM105	TEA014372.1	PVA42	AT4G21450
GM105	TEA004117.1	CSLD4	CSLD4
GM105	TEA018741.1	PRP4	PRP4
GM105	TEA024480.1	SD18	RK3
GM105	TEA006201.1	GLR2.7	GLR2.7
GM105	TEA015513.1	LRX3	AT2G19780
GM105	TEA027114.1	--	AT5G61820
GM105	TEA027661.1	At3g47520	MDH
GM105	TEA026261.1	--	AT5G46220
GM105	TEA032595.1	ARP2	ARP2
GM105	TEA009801.1	AK2	CARAB-AK-LYS
GM105	TEA011385.1	RAC3	RAC10
GM105	TEA019368.1	DTWD2	AT2G41750
GM105	TEA011548.1	LFG4	AT1G03070
GM105	TEA005604.1	At5g35930	AT5G60580
GM105	TEA014558.1	NIC1	NIC1
GM105	TEA000240.1	DDB_G0292320	AT2G15240
GM105	TEA022428.1	PAE8	AT4G19420
GM105	TEA030732.1	--	AT3G06330
GM105	TEA025669.1	--	AT3G06150
GM105	TEA004429.1	--	AT3G01060
GM105	TEA014793.1	RHA2A	BRH1
GM105	TEA007374.1	U2AF65B	ATU2AF65A
GM105	TEA002242.1	EXPA15	EXPA15
GM105	TEA019704.1	NUP107	AT3G14120
GM105	TEA026960.1	DTX42	AT1G51340
GM105	TEA011299.1	AP4M	AT4G24550
GM105	TEA026894.1	POPTR_0018s14250g	CAC2
GM105	TEA018933.1	At5g55950	AT5G55950
GM105	TEA001497.1	GLCAT14A	AT3G24040
GM105	TEA001088.1	ACX1	ACX1
GM105	TEA028573.1	CHX15	CHX15
GM105	TEA025004.1	ADF5	ADF5
GM105	TEA024700.1	--	AT5G28150
GM105	TEA024218.1	GBP4	AT2G38840
GM105	TEA031425.1	NPF4.4	AT1G33440
GM105	TEA016261.1	ALMT14	AT5G46610
GM105	TEA021176.1	EXO70B1	EXO70C1
GM105	TEA012172.1	cyp1	AT2G36130
GM105	TEA000090.1	TTL1	TTL1
GM105	TEA029496.1	KRP7	ICK5
GM105	TEA019678.1	LOG2	LOG2
GM105	TEA032705.1	LPPE2	LPPepsilon2
GM105	TEA024104.1	FRL5	AT5G27220
GM105	TEA033637.1	BDG3	AT4G24140
GM105	TEA004294.1	GLCAT14A	UNE7
GM105	TEA033636.1	BDG1	BDG1
GM105	TEA004770.1	--	--
GM105	TEA029515.1	Zadh2	NQR
GM105	TEA002956.1	At1g19940	GH9B5
GM105	TEA001188.1	At5g22100	AT5G22100
GM105	TEA024440.1	SDIR1	SDIR1
GM105	TEA009770.1	CAB40	CAB1
GM105	TEA025281.1	TIC32	AT5G02540
GM105	TEA022741.1	--	--
GM105	TEA002062.1	surE	AT4G14930
GM105	TEA011634.1	CHX3	CHX3
GM105	TEA003905.1	OFUT11	AT1G38131
GM105	TEA002119.1	--	AT3G18670
GM105	TEA023612.1	OS9	OS9
GM105	TEA009551.1	SPP	SPP
GM105	TEA022665.1	NPC6	NPC6
GM105	TEA033350.1	RPK1	AT2G34930
GM105	TEA011084.1	DTX43	AT4G01860
GM105	TEA006127.1	FH8	FH8
GM106	TEA017203.1	NLP6	AT1G64530
GM106	TEA030443.1	BHLH130	FBH4
GM106	TEA028069.1	LRK10L-1.2	AT1G18390
GM106	TEA032218.1	At2g42960	AT1G56720
GM106	TEA031082.1	CPK8	CDPK19
GM106	TEA029532.1	CBP60A	AT5G62570
GM106	TEA020005.1	MPA1	AT1G63770
GM106	TEA032220.1	At5g18500	AT1G56720
GM106	TEA020695.1	--	AT1G30755
GM106	TEA027035.1	TAF5	TAF5
GM106	TEA005253.1	XRCC2	XRCC2
GM106	TEA029116.1	At5g53180	PTB2
GM106	TEA010605.1	--	AT3G20680
GM106	TEA011836.1	SAUR36	AT3G60690
GM106	TEA023416.1	At1g64760	AT3G24330
GM106	TEA030558.1	--	AT1G72175
GM106	TEA005210.1	CHIP	CHIP
GM106	TEA000706.1	--	AT2G25800
GM106	TEA006888.1	At2g34160	AT1G29250
GM106	TEA031190.1	LE14B_PRUAR LEC14B homolog OS=Prunus armeniaca PE=2 SV=1	AT4G03020
GM106	TEA002986.1	CAT1	CAT2
GM106	TEA032981.1	--	AT1G24440
GM106	TEA030556.1	NUP1	NUP1
GM106	TEA030347.1	SILD_FORIN Secoisolariciresinol dehydrogenase (Fragment) OS=Forsythia intermedia PE=1 SV=1	AT4G03140
GM106	TEA025518.1	--	AT1G27100
GM106	TEA012265.1	DGS1	DGS1
GM106	TEA003107.1	PAT17	AT3G04970
GM106	TEA011247.1	FLCY	FCLY
GM106	TEA025790.1	MYOB7	AT5G06560
GM106	TEA032915.1	At4g22670	AT1G21010
GM106	TEA031818.1	VAMP727	VAMP727
GM106	TEA031039.1	--	--
GM106	TEA024934.1	ALDH3H1	ALDH3H1
GM106	TEA007071.1	NHL13	AT1G17620
GM106	TEA006751.1	12KD_FRAAN Auxin-repressed 12.5 kDa protein OS=Fragaria ananassa PE=2 SV=1	DYL1
GM106	TEA023611.1	XRN4	XRN4
GM106	TEA013991.1	HDR1	AT1G80940
GM106	TEA027535.1	MAOM_SOLTU NAD-dependent malic enzyme 62 kDa isoform, mitochondrial OS=Solanum tuberosum PE=1 SV=1	NAD-ME1
GM106	TEA024538.1	DEGP7	DEG7
GM106	TEA002208.1	SYQ_LUPLU Glutamine--tRNA ligase OS=Lupinus luteus PE=2 SV=2	OVA9
GM106	TEA002275.1	NRPC2	NRPC2
GM106	TEA031333.1	P5CS_ACTDE Delta-1-pyrroline-5-carboxylate synthase OS=Actinidia deliciosa PE=2 SV=1	P5CS2
GM106	TEA031239.1	DAD2	AT3G03990
GM106	TEA024992.1	PILS2	AT1G71090
GM106	TEA011986.1	HDA15	HDA15
GM106	TEA024483.1	SECA2	SECA2
GM106	TEA003626.1	RPD1	AT1G06440
GM106	TEA003595.1	--	AT1G14710
GM106	TEA024388.1	VATB2_GOSHI V-type proton ATPase subunit B 2 (Fragment) OS=Gossypium hirsutum PE=2 SV=1	VAB2
GM106	TEA000896.1	ECH2	ECH2
GM106	TEA032007.1	OR23	AT4G03030
GM106	TEA012659.1	IGS1	AT1G75290
GM106	TEA024254.1	At5g40240	UMAMIT40
GM106	TEA025808.1	ALY2	AT5G02530
GM106	TEA014844.1	PRCP	AT2G24280
GM106	TEA033331.1	prmA	AT5G53920
GM106	TEA022776.1	maoI	AT2G42490
GM106	TEA017137.1	At2g30000	AT1G07170
GM106	TEA006239.1	SODCC.1	CSD1
GM106	TEA006307.1	CYP76B6	CYP76C2
GM106	TEA023594.1	At5g34940	GUS3
GM106	TEA003351.1	--	AT4G14145
GM106	TEA012448.1	--	AT5G51160
GM106	TEA019211.1	APX3	APX3
GM106	TEA016546.1	SH3YL1	AT1G29800
GM106	TEA008176.1	--	AT4G23330
GM106	TEA002452.1	--	--
GM106	TEA027532.1	MAOM_SOLTU NAD-dependent malic enzyme 62 kDa isoform, mitochondrial OS=Solanum tuberosum PE=1 SV=1	NAD-ME1
GM106	TEA032624.1	GST23_MAIZE Glutathione transferase GST 23 OS=Zea mays PE=2 SV=1	GSTU7
GM106	TEA015334.1	SDG40	SDG40
GM106	TEA017102.1	ALDH2B4	ALDH2B4
GM106	TEA031247.1	tropC	AT1G35190
GM107	TEA000440.1	APRR1	TOC1
GM107	TEA011470.1	PHL7	AT2G01060
GM107	TEA011884.1	BHLH25	AT4G37850
GM107	TEA020026.1	ANT	ANT
GM107	TEA009270.1	--	AT4G21310
GM107	TEA029667.1	PUX10	AT4G10790
GM107	TEA019780.1	At4g39753	AT4G39753
GM107	TEA026300.1	At1g13570	AT1G13570
GM107	TEA019240.1	--	AT4G24265
GM107	TEA023054.1	At1g58060	AT5G12950
GM107	TEA028440.1	--	--
GM107	TEA029013.1	--	--
GM107	TEA033640.1	--	--
GM107	TEA002639.1	--	AT3G07510
GM107	TEA032115.1	naat-B	TAT7
GM107	TEA007599.1	BRG1	BRG1
GM107	TEA029502.1	At4g27220	AT4G27220
GM107	TEA029301.1	RPM1	RPM1
GM107	TEA028319.1	PURA	ADSS
GM107	TEA022973.1	ATPC	ATPC1
GM107	TEA026876.1	--	AT5G18980
GM107	TEA021305.1	TRAPPC2	AT1G80500
GM107	TEA010134.1	RGA3	AT3G14460
GM107	TEA001794.1	ENT3	FUR1
GM107	TEA023083.1	At4g30420	UMAMIT34
GM107	TEA000994.1	APRL5	APRL5
GM107	TEA018260.1	CAD	ELI3-1
GM107	TEA003805.1	CYP75A1	CYP706A4
GM107	TEA017838.1	IPK1	IPK1
GM107	TEA030308.1	OFUT30	AT4G17430
GM107	TEA024079.1	--	AT2G44260
GM107	TEA020025.1	PCMP-E76	SLO2
GM107	TEA025044.1	HIPP09	AT5G24580
GM107	TEA004458.1	RLP42	RLP26
GM107	TEA009294.1	UGT85A24	UGT85A3
GM107	TEA006016.1	GCH1	AT3G07270
GM107	TEA033011.1	At4g27190	AT4G27190
GM107	TEA001655.1	NRAMP2	NRAMP2
GM107	TEA032515.1	--	--
GM107	TEA032823.1	At5g60760	AT5G60760
GM107	TEA032377.1	SFH3	SFH3
GM107	TEA014353.1	BON3	BON3
GM107	TEA014098.1	YLS8	YLS8
GM107	TEA029356.1	VIT_19s0014g04930	TPS21
GM107	TEA024805.1	--	AT1G77620
GM107	TEA017425.1	--	--
GM107	TEA001527.1	BON3	BON3
GM107	TEA003358.1	sll0103	AT5G60710
GM107	TEA004725.1	GP1	PG2
GM107	TEA014990.1	PCMP-E9	AHG11
GM107	TEA002504.1	--	AT5G05040
GM107	TEA028101.1	CYP85A1	BR6OX2
GM107	TEA012279.1	At4g27190	AT4G27190
GM107	TEA026157.1	MED33A	RFR1
GM107	TEA009884.1	RGA3	AT3G14470
GM107	TEA028064.1	GALT31A	AT1G32930
GM107	TEA017747.1	At3g14410	AT3G14410
GM107	TEA032824.1	DDB_G0284757	AT5G04250
GM107	TEA028314.1	PURA2	ADSS
GM107	TEA009883.1	GCP2	AT5G17410
GM107	TEA023534.1	ACA8	ACA8
GM107	TEA024998.1	At1g75220	ERDL6
GM107	TEA033872.1	CAD	ELI3-2
GM107	TEA002786.1	DIR19	AT1G58170
GM107	TEA018468.1	AAP6	AAP6
GM107	TEA023160.1	BON3	BON3
GM107	TEA020674.1	--	--
GM107	TEA025120.1	UGT708C1	UGT71C2
GM107	TEA029894.1	ZYP1B	ZYP1b
GM107	TEA005494.1	VPS35B	VPS35B
GM107	TEA013075.1	Bp10	sks4
GM107	TEA033040.1	RTNLB5	AT2G46170
GM107	TEA004424.1	UGT708C1	GT72B1
GM107	TEA033442.1	TAN	ATN
GM107	TEA017699.1	At1g55270	AT1G55270
GM107	TEA032601.1	YSL6	YSL6
GM107	TEA000206.1	RPM1	RPM1
GM108	TEA026952.1	ETR2	ETR2
GM108	TEA021912.1	DOF3.4	OBP1
GM108	TEA030853.1	AGL61	RLP6
GM108	TEA006046.1	NLP6	AT1G64530
GM108	TEA026790.1	At3g48440	AT5G63260
GM108	TEA029100.1	WRKY41	WRKY41
GM108	TEA025851.1	TCP11	AT2G37000
GM108	TEA032961.1	NAC035	NAC036
GM108	TEA025693.1	Os01g0834700	AT2G20280
GM108	TEA018401.1	MYB1	MYB1
GM108	TEA018373.1	LRK10L-1.1	AT1G25390
GM108	TEA005152.1	CIPK7	CIPK7
GM108	TEA025395.1	bud32	AT5G26110
GM108	TEA030138.1	PEP	PEP
GM108	TEA000402.1	CAD	ELI3-2
GM108	TEA015224.1	--	--
GM108	TEA026819.1	SR45A	AT4G35785
GM108	TEA006324.1	CAX5	CAX5
GM108	TEA002566.1	Os06g0170500	MAC5B
GM108	TEA000696.1	--	AT3G11890
GM108	TEA017524.1	At1g15400	AT1G15400
GM108	TEA002549.1	DRP1E	DL1E
GM108	TEA018704.1	TPS9	TPS9
GM108	TEA018762.1	TOL2	AT1G06210
GM108	TEA029833.1	Herc2	AT1G27060
GM108	TEA003509.1	--	--
GM108	TEA030188.1	COPT5.1	COPT5
GM108	TEA012252.1	--	AT3G19990
GM108	TEA015225.1	FDH1	FDH
GM108	TEA007244.1	EP3	EP3
GM108	TEA027581.1	DDB_G0288723	--
GM108	TEA032991.1	SPE2	ADC2
GM108	TEA017062.1	At4g00590	AT4G00590
GM108	TEA029934.1	At1g35710	AT1G35710
GM108	TEA001494.1	PBA1	PBA1
GM108	TEA031533.1	--	--
GM108	TEA002976.1	--	AT1G58170
GM108	TEA026208.1	PAP23	PAP23
GM108	TEA027322.1	AIM1	AIM1
GM108	TEA014717.1	MDAR5	MDAR6
GM108	TEA022918.1	AIM32	AT3G27570
GM108	TEA012872.1	At5g23290	PFD5
GM108	TEA022669.1	--	IQD6
GM108	TEA024000.1	AP4M	AT4G24550
GM108	TEA010192.1	rplA	AT2G42710
GM108	TEA032062.1	--	AT1G57540
GM108	TEA015214.1	ASP1	AT1G44130
GM108	TEA011305.1	ECA1	ECA1
GM108	TEA019917.1	SAE2	SAE2
GM108	TEA008905.1	CNOT10	AT5G35430
GM108	TEA012209.1	PPAN	PPAN
GM108	TEA030469.1	PRMT3	PRMT3
GM108	TEA006296.1	KEA2	KEA2
GM108	TEA024203.1	AHA11	HA11
GM108	TEA010176.1	RZ1A	ATRZ-1A
GM108	TEA012869.1	EAPP	AT5G08320
GM108	TEA018838.1	VTC2	VTC2
GM108	TEA013513.1	SRP68	AT5G61970
GM108	TEA000855.1	--	--
GM108	TEA009935.1	PBD1	PBD1
GM108	TEA003542.1	--	AT1G54520
GM108	TEA021640.1	At3g57940	AT3G57940
GM108	TEA019215.1	--	AT4G21700
GM108	TEA022069.1	LECRKS4	AT5G25270
GM108	TEA014010.1	CBL1	CBL1
GM108	TEA017609.1	--	AT4G13530
GM108	TEA003990.1	At5g55860	AT5G55860
GM108	TEA003344.1	APUM2	PUM2
GM108	TEA017520.1	--	--
GM108	TEA023473.1	At2g40290	AT2G40290
GM108	TEA032183.1	AVT1C	AT2G39130
GM108	TEA033452.1	ACA13	AT3G22910
GM108	TEA016835.1	1MMP	AT4G16640
GM108	TEA033085.1	WDR12	AT5G15550
GM108	TEA023696.1	--	AT5G47830
GM108	TEA020995.1	CPN10	AT1G23100
GM109	TEA003910.1	GATA9	GATA9
GM109	TEA013056.1	WAK2	WAK2
GM109	TEA000534.1	FER	FER
GM109	TEA016313.1	RKF1	RKF1
GM109	TEA030307.1	At1g07650	AT1G07650
GM109	TEA002580.1	FER	AT4G01240
GM109	TEA002519.1	At3g47570	AT3G47570
GM109	TEA019406.1	SD25	SD2-5
GM109	TEA022887.1	BAG2	AT5G14360
GM109	TEA026420.1	--	AT5G59050
GM109	TEA012379.1	APXT	TAPX
GM109	TEA000048.1	GLU1	GH9A3
GM109	TEA005552.1	PARC	GSTU19
GM109	TEA014231.1	SAP5	SAP5
GM109	TEA032982.1	ATG18B	ATG18B
GM109	TEA020302.1	At1g30090	AT1G30090
GM109	TEA032494.1	--	AT4G32680
GM109	TEA003131.1	CNGC15C	CNGC15
GM109	TEA017400.1	GLO4	HAOX1
GM109	TEA024814.1	COX10	COX10
GM109	TEA004399.1	EMB2369	EMB2369
GM109	TEA025774.1	At3g06920	AT3G06920
GM109	TEA017494.1	HRD1A	Hrd1A
GM109	TEA025655.1	SPBC776.05	AT5G35460
GM109	TEA027936.1	--	AT4G21215
GM109	TEA024945.1	GSTX4_TOBAC Probable glutathione S-transferase OS=Nicotiana tabacum PE=2 SV=1	GSTU19
GM109	TEA002643.1	CML3	AGD11
GM109	TEA013458.1	HVA22K	HVA22K
GM109	TEA025102.1	--	--
GM109	TEA028258.1	MY1R1_SOLTU Transcription factor MYB1R1 OS=Solanum tuberosum PE=2 SV=1	AT1G74840
GM109	TEA012467.1	DIR21	AT1G65870
GM109	TEA000046.1	KOR	GH9A1
GM109	TEA022165.1	TKT2	DXPS3
GM109	TEA032206.1	GK1	GK-1
GM109	TEA025071.1	GLR3.4	GLR3.4
GM109	TEA008192.1	RIOK1	AT2G24990
GM109	TEA022296.1	--	--
GM109	TEA019581.1	--	AT3G10630
GM109	TEA019220.1	Ubr7	AT4G23860
GM109	TEA023883.1	LHW	AT5G63830
GM109	TEA021817.1	CYB561B	CYB-1
GM109	TEA026990.1	CYP82A3	CYP82C4
GM109	TEA029245.1	IREG2	IREG2
GM109	TEA015780.1	SBT1.2	SDD1
GM109	TEA009160.1	SAUR32	AT2G46690
GM109	TEA008053.1	HUA2	HUA2
GM109	TEA007525.1	GPAT5	GPAT5
GM109	TEA002900.1	--	AT2G15760
GM109	TEA019161.1	TENA_E	AT3G16990
GM109	TEA018174.1	--	AT1G13130
GM109	TEA022011.1	--	AT5G45290
GM109	TEA014958.1	FRL4A	AT3G22440
GM109	TEA029770.1	HSR201	AT5G17540
GM109	TEA019687.1	--	AT5G62650
GM109	TEA001532.1	PRDA1	AT5G48470
GM109	TEA019177.1	7OMT	AT4G35160
GM11	TEA011601.1	PK1	RLK4
GM11	TEA002677.1	At1g06840	AT1G06840
GM11	TEA008043.1	At4g27290	AT4G27290
GM11	TEA020325.1	URH2	URH2
GM11	TEA022365.1	SNAP33	SNAP33
GM11	TEA029807.1	MOD1	MOD1
GM11	TEA018578.1	IMPA2	IMPA-2
GM11	TEA030783.1	--	AT5G65650
GM11	TEA013633.1	UBC30	UBC30
GM11	TEA016028.1	CNR13	MCA1
GM11	TEA010348.1	Os08g0188000	--
GM11	TEA022492.1	tma22	AT5G11900
GM11	TEA009991.1	RPI3	EMB3119
GM11	TEA011487.1	DFC	SAH7
GM11	TEA024906.1	BXL1	BXL1
GM11	TEA005475.1	PAPS1	PAPS1
GM11	TEA024323.1	pitC	AT1G22180
GM11	TEA028503.1	At1g06960	AT1G06960
GM11	TEA027761.1	cdkal1	AT1G72090
GM11	TEA024898.1	At5g11010	AT5G11010
GM11	TEA003028.1	SBT4.14	XSP1
GM11	TEA028156.1	rmt2	AT5G65860
GM11	TEA005570.1	At3g02060	AT3G02060
GM11	TEA002952.1	VPS36	AT5G04920
GM11	TEA021427.1	URED	URED
GM11	TEA001098.1	At1g01500	AT1G01500
GM11	TEA011870.1	IPK2b	IPK2BETA
GM11	TEA012482.1	UBP3	UBP3
GM11	TEA010536.1	MTPC4	AT1G51610
GM11	TEA030198.1	GSVIVT00026920001	AT3G42950
GM11	TEA007017.1	SPP	SPP
GM11	TEA021714.1	rbrA	AT5G60250
GM11	TEA005611.1	DDB_G0278295	AT5G06480
GM11	TEA002911.1	BET11	BS14A
GM11	TEA018522.1	At5g37930	AT5G37930
GM11	TEA005456.1	CYSZ_CUCMA Citrate synthase, glyoxysomal OS=Cucurbita maxima PE=1 SV=1	CSY2
GM11	TEA023911.1	--	--
GM11	TEA022882.1	APRF1	AT5G14530
GM11	TEA030261.1	pno1	AT3G13230
GM11	TEA025147.1	imp1	AT1G53530
GM11	TEA007255.1	SPPA	SPPA
GM11	TEA004011.1	At5g55950	EMB2769
GM11	TEA003004.1	ABCB9	ABCB9
GM11	TEA003433.1	At1g10310	AT1G10310
GM11	TEA007952.1	TAF7	TAF7
GM11	TEA013494.1	--	AT3G20270
GM11	TEA001748.1	At1g67325	AT1G67325
GM110	TEA011279.1	NLP6	AT1G64530
GM110	TEA012185.1	MAPKKK18	MAPKKK15
GM110	TEA014722.1	RKS1	AT1G11340
GM110	TEA002760.1	At4g27290	AT4G27290
GM110	TEA030211.1	PRK3	PRK3
GM110	TEA032597.1	FTSH2	VAR2
GM110	TEA025832.1	RPL4	RPL4
GM110	TEA000008.1	COR2	AT1G59950
GM110	TEA009525.1	RING1	AT5G08139
GM110	TEA001449.1	--	AT3G19340
GM110	TEA017626.1	CLC-E	CLC-E
GM110	TEA005366.1	LSH2	LSH2
GM110	TEA033867.1	KMS1	KMS1
GM110	TEA005562.1	GC1	SULA
GM110	TEA023055.1	surE	AT1G72880
GM110	TEA006954.1	AHL3	AT4G25320
GM110	TEA003953.1	--	AT1G72020
GM110	TEA014997.1	BMY1	BAM6
GM110	TEA000508.1	CPRD49	AT3G11210
GM110	TEA009646.1	SCPL34	SCPL34
GM110	TEA014236.1	APO1	APO1
GM110	TEA015889.1	CSA1	AT3G51570
GM110	TEA017505.1	RSH1	RSH1
GM110	TEA000072.1	At3g51130	AT3G51130
GM110	TEA011874.1	--	AT5G25840
GM110	TEA017678.1	--	AT2G33855
GM110	TEA030930.1	GYRB	GYRB1
GM110	TEA025940.1	AKN	APK
GM110	TEA012077.1	ROPGEF8	ROPGEF8
GM110	TEA028420.1	hxB	AT5G51920
GM110	TEA010655.1	rnf170	AT4G33940
GM110	TEA003101.1	NPF8.1	PTR1
GM110	TEA010059.1	SPP	SPP
GM110	TEA008253.1	At3g16210	AT3G16210
GM110	TEA013493.1	--	AT1G51560
GM110	TEA017611.1	PCMP-A3	AT1G71460
GM110	TEA007431.1	UGLYAH	UGLYAH
GM110	TEA023688.1	ycf39	HCF244
GM110	TEA022090.1	CAC3	CAC3
GM110	TEA024044.1	SPAPJ696.02	AT1G29800
GM110	TEA024591.1	SETD3	AT5G14260
GM110	TEA018928.1	ACA12	AT3G63380
GM110	TEA008556.1	HCAR	HCAR
GM110	TEA003253.1	--	--
GM110	TEA009427.1	FTIP1	AT3G57880
GM110	TEA008330.1	HPT2	HST
GM110	TEA002198.1	ychF	AT1G56050
GM110	TEA022840.1	iolC	AT1G06730
GM110	TEA001044.1	ISE2	EMB25
GM110	TEA028805.1	AKT1	KT1
GM110	TEA005320.1	fusA1	SCO1
GM110	TEA001011.1	usp13	AT1G04850
GM110	TEA006832.1	BRR2C	AT5G61140
GM110	TEA019779.1	--	AT1G65230
GM110	TEA007725.1	At2g38640	AT2G38640
GM110	TEA016622.1	--	--
GM110	TEA012936.1	dnajb14	AT5G18750
GM110	TEA018818.1	PTAC7	PTAC7
GM110	TEA002610.1	ARALYDRAFT_482607	AT2G36330
GM110	TEA007904.1	--	--
GM110	TEA031318.1	--	--
GM110	TEA009853.1	HEME1	HEME1
GM110	TEA010619.1	STR8	AT1G17850
GM110	TEA027374.1	--	AT2G01220
GM110	TEA023791.1	HEMB1	HEMB1
GM110	TEA028009.1	SAT5	SERAT1%3B1
GM110	TEA006834.1	BRR2C	AT5G61140
GM110	TEA020910.1	rplA	AT2G42710
GM110	TEA013491.1	--	AT1G51080
GM111	TEA010321.1	WLIM2B	WLIM2b
GM111	TEA009409.1	GATA15	GATA15
GM111	TEA030070.1	YAB1	AFO
GM111	TEA004407.1	WRKY4	WRKY4
GM111	TEA033540.1	CRK4	AT5G24430
GM111	TEA032248.1	--	AT3G48800
GM111	TEA010384.1	TPC1A	TPC1
GM111	TEA020795.1	TIP41L	AT4G34270
GM111	TEA009549.1	--	AT3G45020
GM111	TEA020094.1	FRL1	FRL1
GM111	TEA024418.1	--	AT3G59800
GM111	TEA010365.1	CS	ATCS
GM111	TEA031603.1	SSU72	AT1G73820
GM111	TEA022957.1	HPPR	AT1G79870
GM111	TEA025578.1	--	AT1G42960
GM111	TEA028773.1	MTP4	AT3G58060
GM111	TEA015962.1	RABA1F	RABA1f
GM111	TEA018277.1	TRX2	TRX2
GM111	TEA014318.1	RPL34	AT1G26880
GM111	TEA001139.1	--	AT4G13266
GM111	TEA017054.1	HY2	HY2
GM111	TEA017885.1	--	AT5G54540
GM111	TEA016010.1	--	AT1G21510
GM111	TEA020279.1	HISN3	APG10
GM111	TEA031108.1	--	AT5G52220
GM111	TEA004286.1	--	AT2G14825
GM111	TEA022476.1	NRAMP1	NRAMP1
GM111	TEA021479.1	KAS3A	KAS III
GM111	TEA031832.1	GPAT3	GPAT3
GM111	TEA000537.1	Mettl21A	AT1G73320
GM111	TEA006204.1	At4g28440	AT2G33845
GM111	TEA000438.1	CHX18	CHX18
GM111	TEA016254.1	AVP_VIGRR Pyrophosphate-energized vacuolar membrane proton pump OS=Vigna radiata var. radiata PE=1 SV=4	AVP1
GM111	TEA030666.1	ARF1	ARFA1F
GM111	TEA009955.1	FTSHI2	EMB2083
GM111	TEA025434.1	TDL1	AT1G32583
GM111	TEA007292.1	LCAT1	AT1G27480
GM111	TEA031459.1	GDI1	SCN1
GM111	TEA033029.1	CBSX3	CBSX3
GM111	TEA030511.1	Sec11c	AT1G52600
GM111	TEA012429.1	DRM3	DRM3
GM111	TEA005074.1	SSR2	AT5G14030
GM111	TEA015436.1	CPX	LIN2
GM111	TEA005246.1	--	AT3G62650
GM111	TEA015140.1	PAO2	PAO2
GM111	TEA033747.1	RPL3B	RPL3P
GM111	TEA030713.1	BGAL9	AT3G06330
GM111	TEA011183.1	--	AT1G61930
GM111	TEA017938.1	ACT	AT3G26040
GM111	TEA000035.1	ESP3	ESP3
GM111	TEA025550.1	GSTU17	ERD9
GM111	TEA002593.1	--	AT1G55340
GM111	TEA023700.1	--	--
GM111	TEA025599.1	DGK4	DGK4
GM111	TEA003913.1	--	--
GM111	TEA022844.1	MYOB4	AT2G30690
GM111	TEA006665.1	GDH2	GDH2
GM111	TEA009861.1	--	AT1G20460
GM111	TEA024736.1	PMI15	PMI15
GM111	TEA008118.1	At3g22845	AT3G22845
GM111	TEA032865.1	HSP18.1	HSP17.4
GM111	TEA014831.1	--	AT3G45900
GM111	TEA021093.1	MAKR5	MAKR5
GM111	TEA008222.1	THO7A	THO7
GM111	TEA012754.1	VIT_07s0104g01170	AT4G03120
GM111	TEA021492.1	DRP1A	DL1
GM111	TEA031786.1	--	AT5G38360
GM111	TEA024118.1	Prim1	POLA3
GM111	TEA025928.1	GA2OX8	AT5G58660
GM111	TEA015406.1	At4g00590	AT4G00590
GM111	TEA016025.1	NIFU4	NFU4
GM111	TEA025967.1	CYP71A6	CYP71A26
GM111	TEA021022.1	BDF2	AT1G58025
GM111	TEA029405.1	At5g39980	AT5G39980
GM111	TEA012268.1	VPS26B	VPS26B
GM111	TEA028402.1	nus1	LEW1
GM111	TEA030741.1	MBD7	MBD7
GM111	TEA021032.1	--	AT2G46420
GM111	TEA015068.1	DELTA-OAT	DELTA-OAT
GM111	TEA021655.1	PLAT1	PLAT1
GM112	TEA018479.1	IAA26	PAP1
GM112	TEA021269.1	NFYB6	NF-YB6
GM112	TEA011809.1	NFYA9	NF-YA9
GM112	TEA028068.1	At1g53440	AT1G53440
GM112	TEA010716.1	CRK15	CRK15
GM112	TEA004082.1	CRLK2	CRLK2
GM112	TEA023561.1	CRK28	CRK28
GM112	TEA016412.1	At5g05160	RUL1
GM112	TEA033440.1	clpP	AT5G45540
GM112	TEA002789.1	ANN4	ANNAT4
GM112	TEA020984.1	--	--
GM112	TEA026537.1	ACD6	AT4G03490
GM112	TEA001884.1	exgA	--
GM112	TEA005310.1	At4g27190	AT4G27190
GM112	TEA001341.1	ESP3	ESP3
GM112	TEA018179.1	SEOC	AT1G67790
GM112	TEA009153.1	--	AT3G18670
GM112	TEA030455.1	CDC6B	AT1G07270
GM112	TEA018203.1	PBB1	PBB1
GM112	TEA001644.1	--	AT1G02475
GM112	TEA022326.1	PUR5	PUR5
GM112	TEA021535.1	LAR	AT1G75290
GM112	TEA012902.1	AAE18	AAE18
GM112	TEA027489.1	--	AT5G66290
GM112	TEA022112.1	PRXIIE	AT3G52960
GM112	TEA003648.1	--	--
GM112	TEA020136.1	BG4	AT1G77780
GM112	TEA007647.1	kansl3	AT5G41850
GM112	TEA024149.1	ABP19A	GER3
GM112	TEA008506.1	--	--
GM112	TEA011415.1	--	AT4G37190
GM112	TEA013432.1	At4g17486	AT4G25680
GM112	TEA030269.1	OsI_35105	AT2G36580
GM112	TEA032841.1	MUB3	MUB4
GM112	TEA006134.1	BPA1	AT5G32450
GM112	TEA017254.1	--	AT4G27360
GM112	TEA003125.1	CLPP4	CLPP4
GM112	TEA008937.1	RGA1	AT3G14470
GM112	TEA030889.1	GAUT1	GAUT1
GM112	TEA012546.1	GYP7	AT4G28550
GM112	TEA020523.1	--	--
GM112	TEA008862.1	CNOT1	AT1G02080
GM112	TEA020130.1	CBR1	CBR
GM112	TEA004081.1	GGCT2;3	AT1G44770
GM112	TEA024684.1	--	AT3G53270
GM112	TEA019060.1	--	--
GM112	TEA026373.1	--	--
GM112	TEA007826.1	--	AT3G17020
GM112	TEA026749.1	NDX	AT4G03090
GM112	TEA010147.1	GSVIVT00023967001	AT5G58400
GM112	TEA029844.1	AS	GT72B1
GM112	TEA021986.1	SCD2	AT5G13260
GM112	TEA011111.1	--	--
GM112	TEA017120.1	XBAT35	APD1
GM112	TEA017206.1	NAT1	AT2G05760
GM112	TEA003406.1	--	--
GM112	TEA015176.1	TCS2	BSMT1
GM112	TEA008788.1	At4g27190	AT4G27190
GM112	TEA009107.1	LUC7L3	AT5G51410
GM112	TEA032057.1	GPATCH11	AT3G57910
GM112	TEA021226.1	POLH	POLH
GM112	TEA001399.1	RPPL1	AT3G14470
GM112	TEA027587.1	ZFWD1	AT5G51980
GM112	TEA001585.1	At1g12700	RPF1
GM113	TEA022241.1	--	AT4G28030
GM113	TEA011846.1	LECRKS1	AT1G15530
GM113	TEA031295.1	FKBP65	AT5G48570
GM113	TEA011354.1	SCPL53	AT3G56540
GM113	TEA011297.1	Os01g0360600	ATCOAE
GM113	TEA019741.1	At4g02760	AT4G02760
GM113	TEA013867.1	--	AT3G26580
GM113	TEA012273.1	CYP81E8	CYP81D5
GM113	TEA023626.1	At1g67280	AT1G67280
GM113	TEA029518.1	MBR2	MBR2
GM113	TEA032242.1	LIR1	CCL
GM113	TEA032899.1	NDK4	AT4G23895
GM113	TEA029468.1	HTH	AT1G12570
GM113	TEA001525.1	BASS3	AT3G25410
GM113	TEA008221.1	RPE_SOLTU Ribulose-phosphate 3-epimerase, chloroplastic (Fragment) OS=Solanum tuberosum PE=1 SV=1	RPE
GM113	TEA014076.1	Tmem136	AT1G35180
GM113	TEA015720.1	GSTL3	GSTL3
GM113	TEA017604.1	GBA2	AT5G49900
GM113	TEA008585.1	SCPL18	scpl18
GM113	TEA005110.1	SODCP	CSD2
GM113	TEA028541.1	CLEB3J9	TL29
GM113	TEA026213.1	ASB1	ASB1
GM113	TEA012457.1	SEC16B	AT5G47490
GM113	TEA033792.1	KCS12	KCS12
GM113	TEA024169.1	CPN60B4	Cpn60beta4
GM113	TEA002363.1	At2g24020	AT2G24020
GM113	TEA025548.1	NPF4.6	NRT1:2
GM113	TEA008857.1	At4g22758	AT2G27830
GM113	TEA011795.1	OVA4	OVA4
GM113	TEA001746.1	--	AT3G19900
GM113	TEA010077.1	PCTP	CP5
GM113	TEA018276.1	At3g58140	AT3G58140
GM113	TEA003138.1	LOG1	LOG1
GM113	TEA002343.1	WOX13	TRM26
GM113	TEA001686.1	RBCS	RBCS3B
GM113	TEA029517.1	--	--
GM113	TEA016248.1	GDH3	AT1G32470
GM113	TEA008065.1	At4g34730	AT4G34730
GM113	TEA031028.1	CCDA1	CcdA
GM113	TEA009559.1	ROPGAP7	AT5G19390
GM113	TEA009125.1	ATL43	ATL43
GM113	TEA015424.1	Y3IP1_TOBAC Ycf3-interacting protein 1, chloroplastic OS=Nicotiana tabacum PE=1 SV=2	CEST
GM113	TEA030435.1	CAHC_SPIOL Carbonic anhydrase, chloroplastic OS=Spinacia oleracea PE=1 SV=2	CA1
GM113	TEA026948.1	--	--
GM113	TEA011923.1	PSBS	NPQ4
GM113	TEA010013.1	NPF4.6	NRT1:2
GM113	TEA000065.1	UGT92A1	AT5G12890
GM113	TEA031710.1	CCB3	CCB3
GM113	TEA004846.1	ROC1_NICSY 29 kDa ribonucleoprotein A, chloroplastic OS=Nicotiana sylvestris PE=2 SV=1	AT2G37220
GM113	TEA022312.1	CURT1C	AT1G52220
GM113	TEA029677.1	F16P2_SPIOL Fructose-1,6-bisphosphatase, cytosolic OS=Spinacia oleracea PE=1 SV=2	FBP
GM113	TEA017787.1	C7A29_PANGI Cytochrome P450 CYP72A219 OS=Panax ginseng PE=2 SV=1	CYP72A14
GM113	TEA003665.1	HSP70	cpHsc70-1
GM113	TEA016227.1	MIFH_TRITR Macrophage migration inhibitory factor homolog OS=Trichuris trichiura PE=1 SV=2	AT5G01650
GM113	TEA004352.1	PPOX1	PPOX
GM113	TEA016008.1	PKS1	PKS1
GM113	TEA024651.1	G6PDC_SOLTU Glucose-6-phosphate 1-dehydrogenase, chloroplastic OS=Solanum tuberosum PE=1 SV=1	G6PD1
GM113	TEA026067.1	PPH1	TAP38
GM113	TEA007913.1	--	AT2G15560
GM113	TEA018990.1	--	AT5G66090
GM114	TEA028277.1	ycf52	AT4G19985
GM114	TEA004574.1	SD18	RK3
GM114	TEA003498.1	HAT22	HAT22
GM114	TEA011565.1	LRK10	PR5K
GM114	TEA025543.1	At1g14390	AT1G14390
GM114	TEA006304.1	CRK5	CRK
GM114	TEA024797.1	FER	FER
GM114	TEA001376.1	SDR1	SDR1
GM114	TEA006276.1	BPS1	BPS2
GM114	TEA027255.1	--	AT4G20325
GM114	TEA028645.1	EREX	AT3G15920
GM114	TEA000791.1	SKIP24	AT1G08710
GM114	TEA009703.1	--	AT3G13510
GM114	TEA023737.1	RHF2A	RHF2A
GM114	TEA021524.1	--	--
GM114	TEA010099.1	TRB1	TRB1
GM114	TEA005059.1	FAM214B	AT3G26890
GM114	TEA028395.1	MRS2-F	SAG18
GM114	TEA020554.1	--	--
GM114	TEA008042.1	At4g27290	AT4G27290
GM114	TEA016404.1	--	AT4G31340
GM114	TEA005121.1	At1g59780	AT1G59780
GM114	TEA025676.1	slr0305	AT5G19070
GM114	TEA021669.1	GTE6	GTE6
GM114	TEA022344.1	NUDT19	NUDX19
GM114	TEA012478.1	UGT85K5	UGT85A5
GM114	TEA030376.1	--	--
GM114	TEA022091.1	REMO_SOLTU Remorin OS=Solanum tuberosum PE=1 SV=1	AT3G48940
GM114	TEA018208.1	TPP2	TPP2
GM114	TEA008898.1	--	--
GM114	TEA014143.1	MLO8	MLO8
GM114	TEA014710.1	At3g45870	UMAMIT3
GM114	TEA021597.1	AVT6A	AT3G30390
GM114	TEA005108.1	--	--
GM114	TEA019745.1	SDH2-3	AT3G14830
GM114	TEA025779.1	--	AT3G50900
GM114	TEA024950.1	--	AT5G49610
GM114	TEA004960.1	RH38	LOS4
GM114	TEA023733.1	C7A52_PANGI Beta-amyrin 28-oxidase OS=Panax ginseng PE=2 SV=1	CYP716A1
GM114	TEA016629.1	--	AT1G31940
GM114	TEA020594.1	--	AT5G54850
GM114	TEA011087.1	RUBA_PEA RuBisCO large subunit-binding protein subunit alpha, chloroplastic OS=Pisum sativum PE=1 SV=2	CPN60A
GM114	TEA006165.1	timm13-b	--
GM114	TEA010473.1	PUB19	PUB19
GM114	TEA010829.1	GSH1	GSH1
GM114	TEA025105.1	--	AT3G62140
GM114	TEA019659.1	FLA11	FLA11
GM114	TEA012605.1	--	AT5G17510
GM114	TEA020489.1	At3g10130	SOUL-1
GM114	TEA010282.1	--	AT1G26550
GM114	TEA003810.1	At3g03360	AT3G18150
GM114	TEA014949.1	TOPP8	TOPP8
GM114	TEA016499.1	SFGH	SFGH
GM114	TEA015837.1	Os05g0446300	AT4G21110
GM114	TEA003412.1	At5g43560	AT5G43560
GM114	TEA015864.1	KIN12G	AT3G44050
GM114	TEA029623.1	PAP	PAP11
GM114	TEA010988.1	GSTX4_TOBAC Probable glutathione S-transferase OS=Nicotiana tabacum PE=2 SV=1	GSTU25
GM114	TEA013505.1	Usp54	AT3G47910
GM114	TEA008220.1	At5g61440	ACHT5
GM114	TEA023735.1	RHF1A	RHF1A
GM114	TEA026273.1	RTNLB12	AT3G54120
GM114	TEA026482.1	ISPD	ISPD
GM114	TEA031180.1	XTH23	XTR6
GM115	TEA009494.1	MTERF5	MDA1
GM115	TEA027958.1	GATA21	GNC
GM115	TEA008104.1	PDF2	PDF2
GM115	TEA011370.1	BHLH67	AT3G61950
GM115	TEA029774.1	TULP8	TLP1
GM115	TEA005609.1	YAB2	YAB2
GM115	TEA015433.1	MYB61	MYB67
GM115	TEA002938.1	BLH2	BLH2
GM115	TEA031684.1	BPC7	BPC7
GM115	TEA015531.1	TCP9	TCP9
GM115	TEA009146.1	PEPKR2	PEPKR2
GM115	TEA031717.1	PBL3	APK2B
GM115	TEA027328.1	WNK4	WNK6
GM115	TEA019186.1	FBL10	AT2G17020
GM115	TEA022851.1	SKD1	SKD1
GM115	TEA009750.1	CLH1	CLH1
GM115	TEA001896.1	--	--
GM115	TEA028123.1	PUB35	AT2G24370
GM115	TEA002721.1	PUP10	PUP10
GM115	TEA013882.1	--	--
GM115	TEA000209.1	MAKR6	MAKR6
GM115	TEA029167.1	UGT74E2	UGT74E2
GM115	TEA018251.1	At1g80170	AT1G80170
GM115	TEA003853.1	AGD2	ALD1
GM115	TEA009240.1	At4g38520	AT4G38520
GM115	TEA005460.1	PHYA1	PHYA
GM115	TEA024509.1	PPF-1	--
GM115	TEA028181.1	--	AT5G67390
GM115	TEA032215.1	FAM213A	--
GM115	TEA017223.1	At4g19050	AT4G19050
GM115	TEA007867.1	DTX40	AT3G21690
GM115	TEA026752.1	BSL1	BSL1
GM115	TEA026120.1	SUC4	SUT4
GM115	TEA003722.1	MSRA_LACSA Peptide methionine sulfoxide reductase OS=Lactuca sativa PE=2 SV=1	PMSR1
GM115	TEA021335.1	PRAF1	AT5G19420
GM115	TEA021287.1	--	AT5G54630
GM115	TEA007373.1	--	AT1G79160
GM115	TEA026291.1	RCOM_1506700	AT5G04710
GM115	TEA011657.1	RPP13	RPP13
GM115	TEA023805.1	--	RLP47
GM115	TEA014212.1	LONP2_SPIOL Lon protease homolog 2, peroxisomal OS=Spinacia oleracea PE=2 SV=2	LON2
GM115	TEA014680.1	AGO2	AGO2
GM115	TEA016471.1	PSKR	PSKR1
GM115	TEA024454.1	At5g08350	AT5G08350
GM115	TEA006116.1	H1_SOLPN Histone H1 OS=Solanum pennellii PE=2 SV=1	HIS1-3
GM115	TEA001466.1	At2g24580	AT2G24580
GM115	TEA026178.1	CYP734A1	BAS1
GM115	TEA025572.1	HIPL1	AT1G74790
GM115	TEA013922.1	NCA1	AT3G54360
GM115	TEA003235.1	CSA1	CSA1
GM115	TEA007584.1	HINT1	HINT 2
GM115	TEA014782.1	wdr44	AT5G54200
GM115	TEA017587.1	PCMP-A3	AT1G71460
GM115	TEA030668.1	AMT3-1	AMT2
GM115	TEA010786.1	POSF21	AT2G31370
GM115	TEA009378.1	TPR3	TPR3
GM115	TEA008010.1	PCMP-E2	AT4G19220
GM115	TEA029499.1	CER26	AT4G13840
GM115	TEA002927.1	--	AT3G55420
GM115	TEA009386.1	TIC214	YCF1.1
GM115	TEA031724.1	--	AT1G68140
GM115	TEA000229.1	ADO1	ZTL
GM115	TEA029129.1	TPP2	ATTPPA
GM115	TEA006982.1	WEL3	AT5G42880
GM115	TEA004450.1	MAEA	AT3G55070
GM115	TEA030705.1	--	AT4G28690
GM115	TEA014974.1	--	AT1G61350
GM115	TEA021165.1	TMEM45A	AT1G55230
GM115	TEA009593.1	VESTR_MEDSA Vestitone reductase OS=Medicago sativa PE=1 SV=1	BEN1
GM115	TEA024905.1	AAE7	AAE7
GM115	TEA022894.1	MER3	RCK
GM115	TEA015121.1	CYP71A1	CYP71A25
GM115	TEA020504.1	--	AT5G63100
GM115	TEA027279.1	PAB3	PAB3
GM115	TEA028386.1	At1g30680	AT1G30680
GM115	TEA004338.1	--	AT4G17070
GM115	TEA005304.1	HISN4	AT-HF
GM115	TEA007186.1	BIO3-BIO1	BIO1
GM115	TEA014629.1	AFB2	AFB2
GM115	TEA000171.1	--	--
GM115	TEA016975.1	purB	AT1G36280
GM115	TEA029431.1	At1g12760	AT1G12760
GM115	TEA011338.1	ytcJ	LAF3
GM115	TEA027862.1	At5g08350	AT5G08350
GM115	TEA013654.1	--	--
GM115	TEA004714.1	FSD2	FSD2
GM115	TEA012154.1	NRP1	NRP1
GM115	TEA021163.1	YLS3	AT2G44300
GM115	TEA031932.1	ALY3	ALY3
GM115	TEA020838.1	DTX40	AT3G21690
GM115	TEA000089.1	IDM1	ROS4
GM115	TEA031413.1	HSR4	BCS1
GM115	TEA010250.1	At5g38780	AT1G15125
GM115	TEA024813.1	--	--
GM115	TEA025165.1	IQD1	IQD5
GM115	TEA020800.1	LACS1	LACS1
GM115	TEA005822.1	PCMP-H38	LPA66
GM116	TEA011074.1	At1g19860	AT1G19860
GM116	TEA032919.1	CRK8	CRK8
GM116	TEA018610.1	MEKK1	MEKK1
GM116	TEA012571.1	MIK2	AT4G08850
GM116	TEA029191.1	WAK2	WAK2
GM116	TEA021578.1	At4g27290	AT4G27290
GM116	TEA013620.1	CRK29	CRK29
GM116	TEA018604.1	MEKK1	MEKK1
GM116	TEA028001.1	TOP1	TOP1BETA
GM116	TEA025422.1	KIN10A	AT4G14330
GM116	TEA024029.1	At4g18820	AT4G18820
GM116	TEA019832.1	EML3	EML3
GM116	TEA003429.1	XBOS34	XBAT35
GM116	TEA012023.1	SYN3	SYN3
GM116	TEA033127.1	ORC6	ORC6
GM116	TEA004981.1	PMK	AT1G31910
GM116	TEA017960.1	ABCG36	PEN3
GM116	TEA030543.1	RPM1	RPM1
GM116	TEA012336.1	--	--
GM116	TEA030035.1	--	--
GM116	TEA026613.1	FUT11	FUT11
GM116	TEA026057.1	--	--
GM116	TEA024706.1	--	AT3G48770
GM116	TEA017218.1	--	AT1G21680
GM116	TEA014265.1	At1g54570	AT3G02030
GM116	TEA001774.1	ABCC10	ABCC10
GM116	TEA015277.1	--	AT5G45730
GM116	TEA013840.1	--	AT2G32910
GM116	TEA016469.1	SCPL18	scpl18
GM116	TEA002910.1	ALA4	AT1G17500
GM116	TEA022177.1	PRA1B3	PRA1.B3
GM116	TEA001130.1	CYCD3-1	CYCD2%3B1
GM116	TEA029614.1	MDH2	c-NAD-MDH2
GM116	TEA030782.1	--	AT5G49210
GM116	TEA016421.1	At3g47570	AT3G47580
GM116	TEA028692.1	PCMP-E36	AT4G21300
GM116	TEA021941.1	--	AT1G67850
GM116	TEA023898.1	--	AT1G12020
GM116	TEA007780.1	--	AT3G11591
GM116	TEA005155.1	At3g14460	AT3G14460
GM116	TEA003892.1	GLT1	GLT1
GM116	TEA018082.1	SNM1	AT2G45700
GM116	TEA017563.1	CLPP5	CLPP5
GM116	TEA025904.1	LSM4_TOBAC Probable U6 snRNA-associated Sm-like protein LSm4 OS=Nicotiana tabacum PE=2 SV=1	AT5G27710
GM116	TEA027991.1	PI3K1_SOYBN Phosphatidylinositol 3-kinase, root isoform OS=Glycine max PE=2 SV=1	VPS34
GM116	TEA017267.1	At1g12280	SUMM2
GM116	TEA030808.1	HDT1	RIN4
GM116	TEA016792.1	ASAT1	ASAT1
GM116	TEA033438.1	PCMP-E83	AT3G05340
GM116	TEA023919.1	Cherp	AT4G31200
GM116	TEA012322.1	At1g78750	AT1G78750
GM116	TEA005386.1	--	--
GM116	TEA019943.1	EXO70E2	EXO70E1
GM116	TEA018462.1	DYAD	SWI1
GM116	TEA012206.1	--	AT4G02425
GM116	TEA006329.1	--	--
GM116	TEA006625.1	RECQL5	AT1G27880
GM116	TEA025464.1	fam135b	ZW18
GM116	TEA013069.1	C9orf85	AT3G02220
GM116	TEA021467.1	CCR1	AT5G19440
GM116	TEA016197.1	CSTF77	CSTF77
GM116	TEA028185.1	dlcB	AT5G20110
GM116	TEA005634.1	CMTA3	SR1
GM116	TEA031197.1	AGO5	AGO5
GM116	TEA018427.1	--	--
GM116	TEA015612.1	CBP	--
GM116	TEA013290.1	DRM1	DYL1
GM116	TEA000004.1	--	AT5G20110
GM116	TEA005172.1	RD22	RD22
GM117	TEA027307.1	IAA14	IAA14
GM117	TEA032980.1	Os01g0905400	AT3G18960
GM117	TEA026051.1	ZHD6	HB24
GM117	TEA026850.1	WRKY72	WRKY72
GM117	TEA014192.1	PK1	AT5G24080
GM117	TEA033812.1	NUDT9	NUDT9
GM117	TEA007828.1	EFR	AT5G39390
GM117	TEA012442.1	CAD	ELI3-2
GM117	TEA009570.1	RAB2BV	RABA2D
GM117	TEA024910.1	--	AT5G49320
GM117	TEA028117.1	ACA13	AT3G22910
GM117	TEA008634.1	ACER	ATCES1
GM117	TEA018836.1	--	AT1G70780
GM117	TEA008497.1	LRR-RLK	AT3G14840
GM117	TEA010455.1	RIC10	RIC10
GM117	TEA000018.1	C7A12_PANGI Cytochrome P450 CYP736A12 OS=Panax ginseng PE=2 SV=1	CYP71A21
GM117	TEA015595.1	--	AT1G10380
GM117	TEA026526.1	--	AT5G56530
GM117	TEA029919.1	--	AT1G10380
GM117	TEA022319.1	ACT	AT3G26040
GM117	TEA005897.1	PIP5K8	AT1G60890
GM117	TEA003061.1	DJA6	J3
GM117	TEA024283.1	MSH5	MSH5
GM117	TEA017759.1	--	AT4G39900
GM117	TEA031543.1	--	AT1G65270
GM117	TEA018540.1	BHLH111	AT1G31050
GM117	TEA014852.1	--	--
GM117	TEA005451.1	GES	TPS04
GM117	TEA032523.1	--	HSBP
GM117	TEA020002.1	NUDT17	NUDT17
GM117	TEA031391.1	RBOHF	RBOH F
GM117	TEA016501.1	UGT94E5	AT5G49690
GM117	TEA009407.1	--	AT1G02700
GM117	TEA013447.1	LIF2	AT2G44710
GM117	TEA009812.1	Ufd1	UFD1
GM117	TEA003582.1	PAB7	PAB7
GM117	TEA013313.1	NPF4.3	AT1G59740
GM117	TEA019680.1	CAD	ELI3-2
GM117	TEA017249.1	--	AT4G23540
GM117	TEA023901.1	ADF2	ADF3
GM117	TEA018271.1	CYP87A3	CYP87A2
GM117	TEA015657.1	sec24	AT2G27460
GM117	TEA019931.1	WAXY	GBSS1
GM117	TEA020109.1	PSB5_SPIOL Proteasome subunit beta type-5 OS=Spinacia oleracea PE=2 SV=1	AT3G26340
GM117	TEA017191.1	Cenpv	AT5G16940
GM117	TEA032640.1	rlmN	AT1G60230
GM117	TEA019903.1	WDR13	AT2G16405
GM117	TEA017495.1	RHC1A	RHC1A
GM117	TEA009959.1	NIGB_SAMNI Nigrin b OS=Sambucus nigra PE=1 SV=2	--
GM117	TEA028119.1	ACA13	AT3G22910
GM117	TEA029117.1	At1g27530	AT1G27530
GM117	TEA023949.1	CXP;2-3	scpl40
GM117	TEA012930.1	ACP1	ACP4
GM117	TEA006609.1	UGT75L6	IAGLU
GM117	TEA030328.1	NDK1_TOBAC Nucleoside diphosphate kinase 1 OS=Nicotiana tabacum PE=2 SV=1	NDPK1
GM117	TEA031419.1	CSLG2	CSLG2
GM117	TEA013275.1	--	--
GM117	TEA000193.1	MAP65-3	PLE
GM117	TEA014129.1	SOT15	ST2A
GM117	TEA005162.1	GES	TPS04
GM117	TEA007054.1	ACT	AT3G26040
GM117	TEA017172.1	DTX16	AT5G52450
GM117	TEA020707.1	At2g03690	AT2G03690
GM117	TEA004462.1	--	--
GM117	TEA000143.1	NPF1.2	AT1G52190
GM117	TEA020246.1	RGLG1	RGLG1
GM117	TEA003172.1	CFIS2	AT4G25550
GM117	TEA009281.1	At1g66480	AT1G71015
GM117	TEA022617.1	PURA2	ADSS
GM117	TEA007984.1	--	AT2G45250
GM117	TEA010224.1	RDR3	AT2G19910
GM117	TEA029914.1	Unc45a	AT5G10200
GM117	TEA031324.1	At3g47200	AT4G31980
GM117	TEA005756.1	--	AT5G38700
GM117	TEA006349.1	ISS1	AT1G80360
GM117	TEA014989.1	EBOS	TPS02
GM117	TEA016065.1	AAP19-1	AP19
GM118	TEA024795.1	Os01g0253300	IMPA-1
GM118	TEA020435.1	CBR2	AT5G20080
GM118	TEA020140.1	UMAG_01243	AT4G12790
GM118	TEA011263.1	EX2	EX2
GM118	TEA025026.1	AAE	AT5G03980
GM118	TEA013028.1	At3g02090	MPPBETA
GM118	TEA019484.1	ACT7	ACT7
GM118	TEA011120.1	--	--
GM118	TEA003507.1	BCAT2	BCAT3
GM118	TEA004051.1	At5g48730	AT5G48730
GM118	TEA015348.1	ADT1	ADT1
GM118	TEA000925.1	PREP	AT1G76140
GM118	TEA000449.1	TAP46	TAP46
GM118	TEA027287.1	PTP1	PTP1
GM118	TEA030334.1	CSN7	FUS5
GM118	TEA011440.1	RBM39	AT5G09880
GM118	TEA014039.1	Os07g0555200	EIF4G
GM118	TEA007765.1	At3g19330	AT3G19330
GM118	TEA005160.1	MOCS3	CNX5
GM118	TEA023527.1	SIR1	SIR
GM118	TEA025897.1	RPT5A	RPT5A
GM118	TEA000978.1	--	AT2G44380
GM118	TEA022284.1	At4g01037	AT1G79120
GM118	TEA009420.1	--	--
GM118	TEA023780.1	PME7	AT1G02810
GM118	TEA013119.1	At5g19025	AT3G06180
GM118	TEA019390.1	SUFE1	CPSUFE
GM118	TEA022382.1	PAT_PETHY Bifunctional aspartate aminotransferase and glutamate/aspartate-prephenate aminotransferase OS=Petunia hybrida PE=1 SV=1	AAT
GM118	TEA026344.1	VPS52	POK
GM118	TEA010707.1	OsI_016050	AT3G16840
GM118	TEA030891.1	RRP44A	EMB2763
GM118	TEA032255.1	--	GCD1
GM118	TEA032913.1	MED34	RECQL2
GM118	TEA000218.1	EF1	AT1G07920
GM118	TEA027836.1	RPL10A	AT1G08360
GM118	TEA028226.1	--	--
GM118	TEA032992.1	AHA5	HA5
GM118	TEA026439.1	--	--
GM118	TEA032547.1	CPR30	CPR1
GM118	TEA016905.1	At1g12700	RPF1
GM118	TEA020566.1	SAR1A	SAR2
GM118	TEA028585.1	RPS9C	AT5G39850
GM118	TEA012103.1	MEFG2	AT2G45030
GM118	TEA019210.1	--	AT5G52580
GM118	TEA008971.1	At2g39490	AT2G39490
GM118	TEA009152.1	At2g26850	AT2G26850
GM118	TEA003820.1	SEC22	SEC22
GM118	TEA029304.1	RRP45B	CER7
GM118	TEA013499.1	At3g04600	AT3G04600
GM118	TEA016362.1	ALAAT1	AlaAT1
GM118	TEA020438.1	CBR2	AT5G20080
GM118	TEA024252.1	--	AT4G32290
GM118	TEA022765.1	RPS26C	AT3G56340
GM118	TEA032449.1	RPN2	HAP6
GM118	TEA011538.1	RPS23	AT5G02960
GM118	TEA004057.1	At5g48730	AT5G48730
GM118	TEA004405.1	At5g39570	AT3G29075
GM118	TEA005345.1	RING1	AT5G08139
GM118	TEA000862.1	Os03g0237900	CYCJ18
GM118	TEA003291.1	Ighmbp2	AT2G03270
GM118	TEA009881.1	At2g44510	AT2G44510
GM118	TEA000928.1	--	AT1G55865
GM119	TEA028333.1	CDKF-4	AT4G19110
GM119	TEA008240.1	--	--
GM119	TEA003681.1	RPN12B	RPN12b
GM119	TEA016420.1	Ergic3	AT1G36050
GM119	TEA008948.1	KIN7E	AT2G21300
GM119	TEA012923.1	MOR1	MOR1
GM119	TEA030922.1	At4g01037	AT3G58520
GM119	TEA004116.1	ARID3	AT2G17410
GM119	TEA008944.1	IRX9H	IRX9-L
GM119	TEA030799.1	Daglb	AT2G42450
GM119	TEA023486.1	At2g17340	AT4G35360
GM119	TEA006926.1	FGT1	EMB1135
GM119	TEA030373.1	EDR2L	AT5G10750
GM119	TEA013475.1	VATA_DAUCA V-type proton ATPase catalytic subunit A OS=Daucus carota PE=2 SV=1	VHA-A
GM119	TEA002916.1	SEC	SEC
GM119	TEA006233.1	GCP3	SPC98
GM119	TEA023194.1	Noc3l	AT1G79150
GM119	TEA032364.1	PAP15	PAP15
GM119	TEA004862.1	NPY2	NPY2
GM119	TEA005977.1	CSLC4	CSLC04
GM119	TEA020486.1	HPA	HISN6B
GM119	TEA016879.1	OsI_15387	AT1G60730
GM119	TEA000691.1	IF2B_WHEAT Eukaryotic translation initiation factor 2 subunit beta OS=Triticum aestivum PE=1 SV=1	EIF2 BETA
GM119	TEA003015.1	RH1	RH1
GM119	TEA012971.1	R1A-4	AT3G46730
GM119	TEA027856.1	--	AT5G22450
GM119	TEA015547.1	ILL4	IAR3
GM119	TEA029349.1	IPUT1	PGSIP6
GM119	TEA030409.1	--	AT3G27930
GM119	TEA025183.1	MED33A	RFR1
GM119	TEA008941.1	At4g27190	AT4G27190
GM119	TEA003136.1	--	AT4G11790
GM119	TEA020101.1	At2g18193	AT2G18193
GM119	TEA028126.1	ACA13	AT3G22910
GM119	TEA000234.1	CAD1	CAD5
GM119	TEA006952.1	--	--
GM119	TEA032700.1	ENGASE1	ENGase85A
GM119	TEA026981.1	rhiE	AT1G09890
GM119	TEA002658.1	CYP76B6	CYP76C2
GM119	TEA018803.1	--	AT3G07640
GM119	TEA002710.1	FUM1	FUM1
GM119	TEA021330.1	LAC1	LAC1
GM119	TEA028217.1	NRT3.2	AT4G24715
GM119	TEA017543.1	ACT	AT3G26040
GM119	TEA033868.1	RPP8L2	AT1G53350
GM119	TEA028710.1	RBOHA	RBOH F
GM119	TEA004790.1	FIP37	FIP37
GM119	TEA010169.1	DCTPP1	AT3G25400
GM119	TEA008296.1	OFUT9	AT1G35510
GM119	TEA011319.1	Os08g0536000	MAB1
GM119	TEA020506.1	Trmo	AT4G28020
GM119	TEA022017.1	AGAL3	AT3G56310
GM119	TEA004460.1	RS2Z33	RS2Z33
GM119	TEA012253.1	MTP4	AT3G58060
GM119	TEA019918.1	PAP2	PAP10
GM119	TEA007752.1	lactb2	AT1G25375
GM119	TEA025847.1	GONST2	GONST1
GM119	TEA020604.1	--	AT5G54855
GM119	TEA001394.1	TRXH_POPJC Thioredoxin H-type OS=Populus jackii PE=1 SV=1	TH9
GM119	TEA006567.1	ASY1	ASY1
GM119	TEA018335.1	At1g77840	AT1G77840
GM119	TEA025098.1	sec61a	AT2G34250
GM119	TEA013604.1	PIRL_SOLLC Pirin-like protein OS=Solanum lycopersicum PE=2 SV=1	AT2G43120
GM119	TEA015036.1	PUX4	PUX4
GM119	TEA015025.1	hddc2	AT2G23820
GM119	TEA032732.1	ENGASE1	ENGase85A
GM119	TEA008539.1	FCA	FCA
GM12	TEA013034.1	HDG1	HDG1
GM12	TEA017170.1	CDKD-1	CDKD1%3B3
GM12	TEA019353.1	At1g05910	AT1G05910
GM12	TEA030466.1	--	--
GM12	TEA025465.1	UBA1	UBA1
GM12	TEA025921.1	--	AT5G19500
GM12	TEA021610.1	At5g40400	AT5G40400
GM12	TEA011170.1	OEP162	ATOEP16-2
GM12	TEA009708.1	SNRNP48	AT3G04160
GM12	TEA009287.1	--	TPR4
GM12	TEA016626.1	--	AT3G01750
GM12	TEA001889.1	exgA	--
GM12	TEA021377.1	KNAP3_MALDO Homeobox protein knotted-1-like 3 OS=Malus domestica PE=2 SV=1	KNAT3
GM12	TEA034043.1	CHS2	TT4
GM12	TEA001985.1	GFS12	AT5G18525
GM12	TEA000023.1	KPNB1	AT3G08943
GM12	TEA015170.1	IRX9H	IRX9-L
GM12	TEA029165.1	ALG9	EBS3
GM12	TEA004872.1	CCX5	CAX11
GM12	TEA016636.1	MAPR4	MAPR4
GM12	TEA024195.1	UNE12	UNE12
GM12	TEA032118.1	NDUS1_SOLTU NADH dehydrogenase [ubiquinone] iron-sulfur protein 1, mitochondrial OS=Solanum tuberosum PE=2 SV=1	EMB1467
GM12	TEA006859.1	GAPC	GAPC2
GM12	TEA025329.1	DBR	AT1G65560
GM12	TEA012892.1	RING1	AT3G19950
GM12	TEA018087.1	NPR4	AT3G18670
GM12	TEA005605.1	TYW1	AT1G75200
GM12	TEA010548.1	SFH13	AT1G55690
GM12	TEA013944.1	ISU1	ISU1
GM12	TEA033843.1	AXR4	AXR4
GM12	TEA011804.1	DDB_G0275467	AT2G23890
GM12	TEA032188.1	ITN1	AT3G18670
GM12	TEA021594.1	UBA1	UBA1
GM12	TEA028841.1	ADK-B	ADK1
GM12	TEA004239.1	GALT6	AT5G62620
GM12	TEA009778.1	AX6B_SOYBN Auxin-induced protein 6B OS=Glycine max PE=2 SV=1	AT4G38840
GM12	TEA033715.1	--	AT3G61370
GM12	TEA007716.1	AAE7	AAE7
GM12	TEA020442.1	nxt3	AT5G60980
GM12	TEA017551.1	NOMO2	AT3G62360
GM12	TEA014280.1	--	AT4G22360
GM12	TEA018885.1	CYC12	AT5G40810
GM12	TEA023306.1	CD4B	CLPC1
GM12	TEA012093.1	--	--
GM12	TEA022472.1	DCUN1D4	AT1G15860
GM12	TEA027057.1	AFP3	AT3G07255
GM12	TEA013232.1	PEX7	PEX7
GM12	TEA001019.1	NRPB6B	NRPB6B
GM12	TEA024259.1	UVH3	UVH3
GM120	TEA027443.1	ARF17	ARF17
GM120	TEA006709.1	FTSH4	ftsh4
GM120	TEA009374.1	At3g47110	AT3G47110
GM120	TEA033032.1	HT1	AT5G40540
GM120	TEA028132.1	TTC5	--
GM120	TEA028617.1	At3g14460	AT3G14460
GM120	TEA014247.1	RH8	RH8
GM120	TEA033309.1	PIP5K4	PIP5K4
GM120	TEA006150.1	LTO1	LTO1
GM120	TEA006387.1	--	--
GM120	TEA028590.1	MAON_SOLTU NAD-dependent malic enzyme 59 kDa isoform, mitochondrial OS=Solanum tuberosum PE=1 SV=1	NAD-ME2
GM120	TEA010030.1	--	--
GM120	TEA019471.1	TPR4	WSIP2
GM120	TEA014801.1	AKT2	KT2/3
GM120	TEA017546.1	--	AT2G16760
GM120	TEA030755.1	B''BETA	AT5G28850
GM120	TEA003287.1	--	--
GM120	TEA022166.1	LOJ	LOJ
GM120	TEA007941.1	NAA15	EMB2753
GM120	TEA005975.1	At2g44660	AT2G44660
GM120	TEA033229.1	TWN2	TWN2
GM120	TEA017914.1	--	AT2G35790
GM120	TEA004823.1	At3g07680	p24beta2
GM120	TEA004001.1	TEB	AT4G32700
GM120	TEA016131.1	emc3	AT4G12590
GM120	TEA024891.1	HST1	HST
GM120	TEA014709.1	ABCG14	ABCG14
GM120	TEA003615.1	MAA3	AT1G65810
GM120	TEA014657.1	--	AT3G51050
GM120	TEA028291.1	--	AT1G54650
GM120	TEA010516.1	SLC25A44	AT5G15640
GM120	TEA000272.1	SDE3	SDE3
GM120	TEA031651.1	MICU	AT4G32060
GM120	TEA033175.1	At5g02620	AT2G31820
GM120	TEA005546.1	PMAT1	PMAT1
GM120	TEA014507.1	--	--
GM120	TEA018553.1	IRX15-L	IRX15-L
GM120	TEA031906.1	At1g09390	AT1G09390
GM120	TEA004296.1	UBC5	UBC5
GM120	TEA030386.1	--	AT2G30695
GM120	TEA006528.1	ACOC_CUCMA Aconitate hydratase, cytoplasmic OS=Cucurbita maxima PE=2 SV=1	ACO3
GM120	TEA031776.1	murB	--
GM120	TEA012434.1	--	AT3G48770
GM120	TEA011424.1	ECA1	ECA1
GM120	TEA006378.1	--	--
GM120	TEA007369.1	--	--
GM120	TEA028408.1	--	AT5G45540
GM120	TEA004280.1	At3g15140	AT3G15140
GM120	TEA020901.1	DSE1	EMB2757
GM120	TEA015026.1	NSUN2	AT2G22400
GM120	TEA002961.1	--	--
GM120	TEA007462.1	--	AT2G45520
GM121	TEA019652.1	BTAF1	RGD3
GM121	TEA025888.1	At2g19130	AT2G19130
GM121	TEA031442.1	At4g27290	AT4G27290
GM121	TEA020463.1	PIX13	Kin3
GM121	TEA008137.1	MEKK1	AT1G04210
GM121	TEA031384.1	At4g09670	AT4G09670
GM121	TEA013582.1	At5g17580	AT5G17580
GM121	TEA032132.1	znf830	AT3G02860
GM121	TEA016048.1	At4g27190	AT4G27190
GM121	TEA023260.1	KIN14J	AT1G63640
GM121	TEA022934.1	--	AT4G39630
GM121	TEA011346.1	NUDT16	NUDT16
GM121	TEA005017.1	OsI_010151	AT4G34320
GM121	TEA015366.1	ISPD_MENPI (-)-isopiperitenol/(-)-carveol dehydrogenase, mitochondrial OS=Mentha piperita PE=1 SV=1	SDR5
GM121	TEA013489.1	At3g27220	AT1G51540
GM121	TEA012368.1	GLR3.4	GLR3.4
GM121	TEA014412.1	Cht4	EP3
GM121	TEA024718.1	--	AT2G01080
GM121	TEA003207.1	RAB2BV	RABA2D
GM121	TEA027843.1	--	--
GM121	TEA030365.1	At3g02645	AT3G02645
GM121	TEA018448.1	--	--
GM121	TEA020906.1	ACLA-2	ACLA-3
GM121	TEA022196.1	STR1	AT3G57030
GM121	TEA009627.1	--	ASG1
GM121	TEA010890.1	At4g29360	AT5G55180
GM121	TEA027824.1	RBL10	RBL10
GM121	TEA013514.1	LYSA2	AT5G11880
GM121	TEA004438.1	LAT59	AT59
GM121	TEA023930.1	--	AT1G60995
GM121	TEA026007.1	nop56	NOP56
GM121	TEA031209.1	At1g28695	AT1G28710
GM121	TEA018643.1	At3g53170	AT3G53170
GM121	TEA030754.1	Ankrd13b	AT1G04780
GM121	TEA029420.1	HAC12	HAC12
GM121	TEA003091.1	RIN4	RIN4
GM121	TEA019393.1	PSKR1	AT2G34930
GM121	TEA020673.1	At1g12775	AT1G12775
GM121	TEA026370.1	MORC3	DMS11
GM121	TEA008297.1	--	--
GM121	TEA033097.1	ADT2	ADT2
GM121	TEA019710.1	--	--
GM121	TEA016494.1	NEDP1	AT5G60190
GM121	TEA033712.1	--	--
GM121	TEA015473.1	OEP80	AT3G44160
GM121	TEA011672.1	--	--
GM121	TEA029689.1	SUD1	AT3G47550
GM121	TEA011914.1	UUAT1	AT5G04160
GM121	TEA029876.1	At4g27190	AT4G27190
GM121	TEA033377.1	UGT73C6	UGT73C6
GM121	TEA023985.1	VPS29	MAG1
GM121	TEA019889.1	At3g07870	AT3G07870
GM121	TEA021849.1	MSSP2	TMT2
GM121	TEA018787.1	--	AT2G04340
GM121	TEA015736.1	--	--
GM121	TEA029882.1	mutS2	AT1G65070
GM122	TEA008298.1	MYB330	MYB6
GM122	TEA010479.1	FER	FER
GM122	TEA024499.1	CRCK2	CRCK2
GM122	TEA009438.1	At4g03230	AT4G03230
GM122	TEA009030.1	MIK2	AT4G08850
GM122	TEA027362.1	FER	FER
GM122	TEA011216.1	At1g61550	AT1G61550
GM122	TEA005795.1	PUB14	AT4G16490
GM122	TEA007318.1	UBP2	UBP2
GM122	TEA004916.1	ENT3	FUR1
GM122	TEA017220.1	At4g19050	AT4G19050
GM122	TEA020832.1	LOX3.1	LOX3
GM122	TEA029613.1	HSP26-A	GSTU7
GM122	TEA015690.1	At3g23880	AT3G23880
GM122	TEA010378.1	Ccdc97	AT5G47090
GM122	TEA020509.1	OFUT19	AT2G37980
GM122	TEA017818.1	PME64	AT5G64640
GM122	TEA011480.1	AOC3	AOC3
GM122	TEA012553.1	At3g07570	AT3G07570
GM122	TEA011922.1	At3g04780	AT3G04780
GM122	TEA031479.1	UGT73C3	AT2G36780
GM122	TEA007978.1	KRTCAP2	AT1G77350
GM122	TEA003275.1	LPAT2	LPAT2
GM122	TEA025114.1	PLT5	PMT5
GM122	TEA021585.1	--	AT3G04650
GM122	TEA010434.1	ND5	NAD5A
GM122	TEA010662.1	--	AT1G76240
GM122	TEA007356.1	VSR2	VSR2
GM122	TEA001944.1	PURU2	AT4G17360
GM122	TEA024100.1	NPF8.3	PTR2
GM122	TEA000757.1	SKOR	SKOR
GM122	TEA023528.1	ACA5	ACA8
GM122	TEA023220.1	At2g47680	AT2G47680
GM122	TEA024544.1	PUB43	PUB43
GM122	TEA003347.1	--	AT1G06710
GM122	TEA009360.1	REV	REV
GM122	TEA013104.1	CYP86B1	CYP96A10
GM122	TEA031248.1	UGT80B1	UGT80B1
GM122	TEA028888.1	rio1	AT2G24990
GM122	TEA009322.1	--	AT3G62630
GM122	TEA027248.1	R1A-10	AT3G46730
GM122	TEA013285.1	HSP26-A	GSTU7
GM122	TEA031461.1	--	GMI1
GM122	TEA001672.1	HIDM	CXE12
GM122	TEA001496.1	CPN60-2	HSP60
GM122	TEA033041.1	--	AT4G10360
GM122	TEA003009.1	ABCB9	ABCB9
GM122	TEA011766.1	PAB6	PAB6
GM122	TEA029432.1	RD21B	RD21B
GM122	TEA023855.1	GLR2.7	GLR2.7
GM122	TEA002951.1	--	AT3G04650
GM122	TEA006076.1	RPM1	RPM1
GM122	TEA004925.1	--	--
GM122	TEA014292.1	--	--
GM122	TEA025009.1	NFD4	AT2G16660
GM122	TEA029549.1	MARD1	AT3G22550
GM122	TEA014767.1	PDR1	ABCG40
GM122	TEA005036.1	PDK	PDK
GM122	TEA009367.1	abhd17c	AT4G31020
GM122	TEA020036.1	PBG1	PBG1
GM122	TEA013002.1	PMI1	MEE31
GM122	TEA010235.1	GDCSP	GLDP2
GM122	TEA022306.1	ROPGEF12	ROPGEF12
GM122	TEA006713.1	AS	UGT72B3
GM122	TEA031673.1	CAD	CAD9
GM122	TEA028080.1	MLO3	MLO3
GM123	TEA031662.1	--	AT2G06025
GM123	TEA033453.1	MBF1C	MBF1C
GM123	TEA021077.1	PIGL	AT3G58130
GM123	TEA031815.1	DIVARICATA	AT5G04760
GM123	TEA012764.1	HSFB2A	HSFB2A
GM123	TEA008270.1	ERF053	ERF53
GM123	TEA022795.1	HSFB2A	HSFB2A
GM123	TEA023633.1	HSF30	HSFA2
GM123	TEA027296.1	MIK2	AT4G08850
GM123	TEA015085.1	LECRKS4	AT3G55550
GM123	TEA020916.1	CPK6	PEPKR1
GM123	TEA017616.1	Scyl2	AT1G22870
GM123	TEA003158.1	At5g38780	AT1G68040
GM123	TEA029396.1	CPSF160	CPSF160
GM123	TEA033883.1	--	--
GM123	TEA020137.1	PUB42	AT1G68940
GM123	TEA006526.1	CUT1	KCS6
GM123	TEA031677.1	FFC	CPSRP54
GM123	TEA031302.1	TIC32	AT4G24050
GM123	TEA021542.1	--	AT3G53400
GM123	TEA026048.1	RPK1	AT2G34930
GM123	TEA005207.1	AIR12	AIR12
GM123	TEA008547.1	serA	AT1G72190
GM123	TEA003115.1	PLSP1	PLSP1
GM123	TEA025275.1	GRV2	GRV2
GM123	TEA029754.1	PDR2	ABCG34
GM123	TEA029389.1	DTX31	RSH2
GM123	TEA012947.1	CML35	AT2G41410
GM123	TEA011850.1	CML30	AT3G29000
GM123	TEA012361.1	NRAMP3	NRAMP3
GM123	TEA015617.1	--	AT5G24320
GM123	TEA025148.1	RPM1	RPM1
GM123	TEA008183.1	--	--
GM123	TEA000990.1	BI-1	BI1
GM123	TEA020099.1	CUV	EMB3011
GM123	TEA024965.1	RPI2	RPI2
GM123	TEA019254.1	BAC2	BAC2
GM123	TEA025332.1	At1g30700	AT1G30700
GM123	TEA032903.1	AMAT	AT5G17540
GM123	TEA030671.1	RPT3	NPH3
GM123	TEA026655.1	HSP18.2	AT2G29500
GM123	TEA004686.1	HSP17.9-D	HSP17.6II
GM123	TEA030635.1	DNAJB4	AT2G20560
GM123	TEA031808.1	lip	AT1G10740
GM123	TEA023100.1	HIPP36	AT5G27690
GM123	TEA007001.1	CYP71A9	CYP83B1
GM123	TEA030322.1	HSP23.6	HSP23.6-MITO
GM123	TEA013393.1	--	AT1G64140
GM123	TEA022497.1	DI19-4	AT3G06760
GM123	TEA014826.1	NRG2	AT1G21740
GM123	TEA025299.1	PRCP	AT5G65760
GM123	TEA015154.1	DNAJB4	AT2G20560
GM123	TEA015275.1	AGO2	AGO2
GM123	TEA016515.1	--	AT2G34340
GM123	TEA032636.1	--	RVE8
GM123	TEA020355.1	ACLA-2	ACLA-3
GM123	TEA006940.1	--	AT4G21890
GM123	TEA018243.1	KAI2	KAI2
GM123	TEA015485.1	--	AT5G35320
GM123	TEA023244.1	Dnajb8	AT1G56300
GM123	TEA005506.1	NLP6	AT1G64530
GM123	TEA027790.1	HSP83A	HSP90.1
GM123	TEA012844.1	--	NTMC2T5.2
GM123	TEA029113.1	CXE15	AT5G06570
GM123	TEA014553.1	--	AT3G21570
GM123	TEA008352.1	PVA41	MAMI
GM123	TEA028182.1	5FCL	5-FCL
GM123	TEA033880.1	dadD	--
GM123	TEA018173.1	--	--
GM123	TEA025186.1	PUB38	PUB38
GM123	TEA028363.1	At5g13980	AT5G13980
GM123	TEA003545.1	exgA	--
GM123	TEA027116.1	--	AT5G07330
GM123	TEA014336.1	KDSB	CKS
GM123	TEA017031.1	GDI2	GDI2
GM123	TEA002839.1	POL2A	TIL1
GM123	TEA006288.1	QR1_TRIVS Quinone-oxidoreductase QR1, chloroplastic OS=Triphysaria versicolor PE=1 SV=1	AT4G13010
GM123	TEA020982.1	--	--
GM124	TEA031071.1	BPM1	BPM2
GM124	TEA025880.1	HMGB2	AT3G11780
GM124	TEA001575.1	At4g03160	AT4G03160
GM124	TEA009193.1	MYC2	MYC2
GM124	TEA015363.1	HOS1	HOS1
GM124	TEA016296.1	PXC1	AT2G36570
GM124	TEA016781.1	ERECTA	ER
GM124	TEA004213.1	CRCK2	CRCK2
GM124	TEA015676.1	MPK9	MPK9
GM124	TEA008237.1	At1g11330	AT1G11330
GM124	TEA031584.1	dyrk2	AT1G73460
GM124	TEA015845.1	KIPK2	AT2G36350
GM124	TEA030954.1	MIK2	AT4G08850
GM124	TEA020132.1	--	AT3G52110
GM124	TEA027246.1	--	AT5G16250
GM124	TEA028809.1	RBG7	GRP7
GM124	TEA009394.1	CYCA1-1	CYCA1%3B1
GM124	TEA008282.1	EXPB3	EXPB3
GM124	TEA033276.1	ACD6	AT4G03460
GM124	TEA015851.1	--	AT3G06840
GM124	TEA009056.1	HRD3A	EBS5
GM124	TEA006681.1	LCBK1	LCBK1
GM124	TEA000955.1	MC410	NINJA
GM124	TEA004275.1	HIPL1	AT1G74790
GM124	TEA012610.1	CPSF73-II	CPSF73-II
GM124	TEA026077.1	CBSCBSPB4	AT5G50530
GM124	TEA020018.1	PIP1-3	PIP1B
GM124	TEA029452.1	KIN8A	AT1G18550
GM124	TEA007216.1	1433_PEA 14-3-3-like protein OS=Pisum sativum PE=2 SV=1	GRF2
GM124	TEA006231.1	At5g67130	AT5G67130
GM124	TEA024175.1	At1g16350	AT1G16350
GM124	TEA017768.1	APT5	APT5
GM124	TEA032496.1	NRG2	AT5G25590
GM124	TEA021347.1	KIRO_ACTDE Kirola OS=Actinidia deliciosa PE=1 SV=1	MLP34
GM124	TEA025311.1	SUN2	SUN2
GM124	TEA018457.1	At3g47200	AT3G50150
GM124	TEA011822.1	At5g51380	AT5G51380
GM124	TEA000669.1	--	TRM8
GM124	TEA004668.1	--	AT2G40020
GM124	TEA001132.1	NLP3	AT5G12040
GM124	TEA034027.1	SCPL6	scpl6
GM124	TEA021726.1	ANKRD13B	AT3G04470
GM124	TEA000222.1	PER21	AT2G37130
GM124	TEA010649.1	SPAC869.01	AT4G34880
GM124	TEA020037.1	At1g54730	AT1G54730
GM124	TEA007522.1	--	AT3G09430
GM124	TEA034034.1	SCPL16	scpl16
GM124	TEA025142.1	LCBK1	LCBK1
GM124	TEA009286.1	PI4KG3	AT5G24240
GM124	TEA004202.1	CCX3	CAX9
GM124	TEA029450.1	At5g58090	AT5G58090
GM124	TEA005515.1	HESO1	HESO1
GM124	TEA016914.1	MIMI_L728	AT5G43390
GM124	TEA005373.1	AGD14	ZIGA4
GM124	TEA017059.1	NAT2	AT2G34190
GM124	TEA025064.1	At1g57790	AT1G57790
GM124	TEA030724.1	At3g47200	AT3G50170
GM124	TEA026103.1	SKU5	SKU5
GM124	TEA020635.1	gacHH	AT1G18610
GM124	TEA008419.1	CDCA7L	AT2G23530
GM124	TEA016089.1	FAD2	FAD2
GM124	TEA021225.1	neur	AT4G20160
GM124	TEA020749.1	At4g10955	AT5G50890
GM124	TEA001415.1	DNAJB12	EIP9
GM124	TEA003496.1	PDCB2	AT1G13830
GM124	TEA013011.1	--	AT1G67035
GM124	TEA026923.1	PBP1	AT5G35830
GM124	TEA026434.1	--	AT1G20070
GM124	TEA006475.1	5MAT2_SALSN Pelargonidin 3-O-(6-caffeoylglucoside) 5-O-(6-O-malonylglucoside) 4'''-malonyltransferase OS=Salvia splendens PE=1 SV=1	AT3G26040
GM124	TEA015825.1	--	AT5G44040
GM124	TEA004851.1	BUB3.2	BUB3.2
GM124	TEA014065.1	MPP	AT1G51980
GM124	TEA021151.1	CCN2_ANTMA G2/mitotic-specific cyclin-2 OS=Antirrhinum majus PE=2 SV=1	CYC1BAT
GM124	TEA018914.1	--	--
GM124	TEA027256.1	POPTR_0012s05040g	CYP77A5P
GM124	TEA012124.1	OBGL	EMB269
GM125	TEA029478.1	ZFP4	ZFP4
GM125	TEA015144.1	GLK2	GLK2
GM125	TEA013839.1	UNE12	UNE12
GM125	TEA032004.1	REM16	AT4G33280
GM125	TEA019792.1	RAP2-3	EBP
GM125	TEA001612.1	ASK1	SK 11
GM125	TEA019855.1	SAPK3	SNRK2.5
GM125	TEA011280.1	STY17	AT3G22750
[truncated: 28,003 more rows]
